1 Dietary supplementation with products of *Citrus reticulata* "Chachi" for  
2 improving the fecal microbiome of weaned piglets

3

4 Huafeng Lin<sup>a, b, ‡, \*</sup>, Gang Li<sup>c, ‡</sup>, Haizhen Wang<sup>d, ‡</sup>, Lili Li<sup>b</sup>, Xun Chen<sup>b</sup>, Lei Shi<sup>b, \*\*</sup>,  
5 Yong Tang<sup>b</sup>, Yanlei Chang<sup>b</sup>, Jie Yang<sup>e</sup>, Yuqi Liu<sup>b</sup>, Hanyue Gong<sup>b</sup>

6 <sup>a</sup>Department of Biotechnology, College of Life Science and Technology, Jinan  
7 University, Guangzhou, Guangdong 510632, PR China;

8 <sup>b</sup>Institute of Food Safety and Nutrition, Jinan University, Guangzhou 510632, PR  
9 China;

10 <sup>c</sup>Institute of Biomedicine and Department of Cell Biology, Jinan University,  
11 Guangzhou 510632, P.R. China;

12 <sup>d</sup>Food and Health Engineering Research Center of the State Education Ministry,  
13 School of Life Science, Sun Yat-Sen University, Guangzhou, PR China;

14 <sup>e</sup>Key Laboratory of Functional Protein Research of Guangdong Higher Education  
15 Institutes, Institute of Life and Health Engineering, College of Life Science and  
16 Technology, Jinan University, Guangzhou 510632, PR China;

17 <sup>‡</sup>These authors contributed equally to this work and should be considered as co-first  
18 authors of the article.

19 \*Corresponding Author: Huafeng Lin, E-mail address, 88983088@qq.com.

20 \*\*Corresponding Author: Lei Shi, E-mail address, 1140561890@qq.com

21

22 **Abstract**

23 Nutritional interventions play a critical role in modifying the intestinal microbiome of  
24 host animals. This study was conducted to interrogate the physiological effects on

25 fecal microflora of weaned piglets via the dietary supplemented with two types of  
26 products of *Citrus reticulata* "Chachi", respectively. For this purpose, A total of 72  
27 piglets with uniform sizes were randomly assigned to four dietary treatment groups  
28 consisted of a negative control group (NCG), a fermented citrus *reticulata* "Chachi"  
29 pulp group (FCRPG), a *Citri Reticulatae Pericarpium* group (CRPG) and a positive  
30 control group (PCG) in a 21-day feeding trial. After the raising experiment, fresh  
31 feces of piglets were analyzed systematically using multi-omics technologies.  
32 Metagenomics method with high-throughput compositional characterization indicated  
33 that the architecture and diversity of fecal microbiome were both influenced by these  
34 two additives and compound antibiotics. Metabolite analysis showed that FCRPG  
35 have an significant effects on fecal short-chain fatty acids (SCFAs) among four  
36 treatment groups. Results of functional proteomics approaches found that FCRPG  
37 presented the highest butyrate metabolic level, and CRPG showed the highest flavone  
38 and flavonol biosynthesis level in feces. In addition, NCP produced an effective effect  
39 on adjusting fecal microbiota profile. Consequently, our findings demonstrate that  
40 dietary supplementation with FCRP or CRP modulates the microbial taxa, metabolic  
41 and proteomic alterations in fecal microbiota of weaned piglets for health  
42 maintaining.

43

## 44 **Introduction**

45 Swine is an important economic specie in livestock production worldwide. The  
46 microbiome within digestive tract of each swine is a complex and miraculous system  
47 [1], which are usually associated with physiological functions such as energy

48 metabolism, immune regulation and gene expression. The vast majority of commensal  
49 micro-bacteria are well adapted to the host environment but also can be shaped by  
50 various factors such as nutrient import and external circumstances [2, 3]. Weanling  
51 period is a special developmental stage throughout the entire lifecycle of pig, during  
52 which piglets have exhibited rapid growth, high demand for nutrition, fast energy  
53 harvesting capability [4], and succession of gut microbial composition [5-7]. However,  
54 common diseases such as digestive disorders and intestinal inflammation, often  
55 plague the piglet farming during this rearing phase. Gut microbiota obviously play the  
56 function of facilitating adaption of weanling piglets to fibrous ingredients and  
57 reducing the risk of colonization of enteric pathogens after weaning [8]. Actually,  
58 although antibiotics have been pervasively applied many decades for antimicrobial  
59 application and growth promoting for livestock in China, European Union has banned  
60 their prophylactic use in modern swine industry for the potential public hazard of  
61 bacterial resistances and drug residues since 2006 [9, 10]. Thus, nutritional strategies  
62 have been employed as an efficient way to improve intestinal microbiota architecture  
63 for the purpose of restricting the use of antibiotics and enhancing the health of piglets  
64 except for alternative methods such as management and housing [11-13].

65 To our knowledge, fresh citrus fruits are often used directly in piggeries in tropical  
66 countries or regions such as Vietnam, Colombia, Guadeloupe, United States,  
67 Netherlands, but their quantity of usage is limited [14]. So far, citrus pulp are mainly  
68 utilized as energy source for ruminant livestock (such as cattle, sheep, etc.), and also  
69 as a dietary supplementation in pigs [15]. However, the usage method (dried citrus pulp

70 vs. ensiled citrus pulp) and quantity of citrus pulp are well controlled and vary with  
71 the differences of mammalian digestive systems. For instance, Cerisuelo et al. (2010)  
72 reported that utilization of ensiled citrus pulp in the diets of growing pigs has no  
73 deleterious effects on the growth performance and meat quality, and shows potential  
74 benefits for gastrointestinal (GI) tract microorganisms [16].

75 According to the publications of the Committee on Herbal Medicinal Products  
76 (HMPC) at the European Medicines Agency (EMA), many medicinal plants have  
77 been conventionally used for the remedy of GI diseases [17]. Similarly in China, Citri  
78 Reticulatae Pericarpium (CRP), made from peels of *Citrus reticulata* "Chachi", is one  
79 of the most famous Chinese medicines officially presented in the Chinese  
80 Pharmacopoeia [18]. Traditionally, CRP is used to ameliorate digestion metabolism  
81 and deal with certain respiratory disorders such as cough and phlegm [19]. Previous  
82 study revealed that CRP possesses approximately 140 chemical compounds such as  
83 flavonoids, essential oils, polysaccharides, carotenoids, vitamins, minerals and so on  
84 [20]. Recently, CRP has been developed for functional food additives as they possess  
85 many vital pharmacological properties such as anti-oxidative activity,  
86 anti-inflammatory activity, anticancer effect, anti-asthmatic activity and so on  
87 [20–22].

88 Fermented citrus reticulata "Chachi" pulp (FCRP), a type of by-products in the  
89 production of CRP, have been naturally fermented/ensiled for appropriate 15 days  
90 after being crushed and deseeded. Nutritional studies suggested that citrus pulp is a  
91 good source of sugars [23], flavanones [24], phenolic compounds [25], vitamins [26]

92 and minerals [27], etc. In the pig production, FCRP can also be used as a dietary  
93 acidifier to minimise detrimental effects due to its high contents of antimicrobial  
94 organic acids [28]. In addition, the fermentation technique is a kind of good way to  
95 reduce anti-nutrients (e.g., tannin and phytate [29]) in citrus reticulata "Chachi" pulp,  
96 and to enhance the levels of beneficial microorganisms (e.g., lactic acid) slightly so as  
97 to improve diet palatability and digestibility.

98 Nowadays, with the advance of multi-omics technologies, we are able to  
99 intensively dissect the correlations among fecal microbiota composition, fecal  
100 proteomics profile and microbial metabolites, which in relation to the disease and  
101 health of weaned piglets.

102 The objective of present study is to assess effectiveness and functionality by the  
103 dietary inclusion of processed products of Citrus reticulata "Chachi" for optimizing  
104 fecal bacterial community composition of weaned piglets. For this purpose, we  
105 integrated advanced multi-omics technologies to evaluate the influences of dietary  
106 administration of FCRP, CRP and antibiotics, respectively, to reveal the relationship  
107 between dietary intake components and fecal microbial composition. Finally, various  
108 functional proteins were identified by searching proteomics databases, revealing the  
109 presence of several functional pathways that linked these exogenous additives (FCRP,  
110 CRP and antibiotics) to fecal microbiota.

## 111 **Materials and methods**

### 112 **Animal experiments**

113 The animal care and procedures used in this investigation were performed in term of

114 the guidelines of the China Animal Protection Association, and were approved by the  
115 Institutional Animal Ethics Committee of Jinan University.

### 116 **Animal raising and operations**

117 Under uniform conditions of husbandry, 72 healthy piglets (Duroc × Landrace ×  
118 Large White), which weaned at the age of 3 weeks with mean body weight of  $6.38 \pm$   
119  $0.18$  kg, were stochastically allocated to four treatment groups, with each group  
120 comprising three replicated pens of 6 piglets. These castrate piglets were reared in  
121 cement floor pens ( $2.0 \text{ m} \times 2.5 \text{ m}$ ) with ad libitum access to clean drinking water for  
122 21 days. Prior to the trial, all piglets were received to the basal diets formulated in  
123 accordance with recommendations of NRC (2012) [30]. During the experiment,  
124 ambient air temperature in the open pens was maintained at  $20\text{--}26$  °C. The routine  
125 work of hog lots are implemented according to the pigsty management procedures.

### 126 **Ingredients preparation and formulation design**

127 FCRP and CRP used in the present trial were supplied in part by Xinhui "Yi Pintang"  
128 tea ceremony factory (Jiangmen, China) and Xinhui "Gan Cheng" tea ceremony  
129 factory (Jiangmen, China). The *Citrus reticulata* "Chachi" fleshes were crushed,  
130 deseeded and stored in a polythene food barrel with a bottom diameter of 1.0 m and  
131 height of 2.0 m for continuous fermentation of about half a month. CRP that stored  
132 hermetically and aged for over 3 years were smashed into powder prior to use.

133 Four dietary formulations fed for piglets (Table 1) were set as follows: negative  
134 control group (NCG), fermented citrus reticulata "Chachi" pulp group (FCRPG), Citri  
135 Reticulatae Pericarpium group (CRPG) and positive control group (PCG).

## 136 **Sample collection and processing**

137 Flesh stool specimens were immediately collected either using a sterilized  
138 cryopreservation tube with a collection brush during defecation or via rectal massage  
139 method noninvasively [31]. Three samples from different piglets of same treatment  
140 group were merge into one tube, which was quickly snap-frozen in liquid nitrogen and  
141 transported to laboratory for DNA extraction, the remaining samples are stored at -80  
142 °C for further processing.

## 143 **DNA extraction and 16S rRNA gene sequencing**

144 Bacterial DNA was extracted from unprocessed piglets' feces using QIAamp DNA  
145 Mini Kit (Qiagen, Hilden, Germany) following the internal quality SOP of products.  
146 The final DNA concentrations were determined using a Nanodrop 2000 UV/Vis  
147 spectrophotometer (Thermo Fisher Scientific, Wilmington, United States) on the basis  
148 of the absorbance of 260 nm to 280 nm, and agarose gel electrophoresis test was used  
149 for evaluation of the DNA integrity as previously described [32]. Negative controls  
150 were performed for the extraction process and evaluated by gel analysis after  
151 polymerase chain reaction (PCR) amplification. For deep sequencing analysis, the  
152 V3-V4 hypervariable regions of the 16S rRNA gene was amplified using forward  
153 (338F, 5'-ACTCCTACGGGAGGCAGCAG-3') and reverse (806R,  
154 5'-GGACTACHVGGGTWTCTAAT-3') primers conducted on a QuantStudio™ 6  
155 Flex (Life Technologies, U.S.) PCR system. PCR reactions were performed in  
156 triplicate 20 µL mixed solution containing 10 ng template DNA, 4 µL 5 × FastPfu  
157 buffer, 2 µL dNTPs (2.5 mmol/L), 0.8 µL each primer (5.0 µmol/L), 0.4 µL FastPfu

158 polymerase and ddH<sub>2</sub>O. The reaction conditions for PCR were 95 °C for 3 min for an  
159 initial denaturation, followed by 27 cycles of denaturation at 95 °C for 30 s, primer  
160 annealing at 55 °C for 30 s, extension at 72 °C for 45 s, and a final elongation for 10  
161 min at 72 °C . The PCR products were extracted from 2% agarose gels, and by  
162 following the manufacturer's instructions, the further purification and quantification  
163 were used the AxyPrep DNA Gel Extraction Kit (Axygen Biosciences, Union City,  
164 CA, U.S.) and QuantiFluor™-ST (Promega BioSciences LLC, Sunnyvale, CA, U.S.),  
165 respectively. In the PCR reactions, samples without template and those contained  
166 known 16S rRNA gene sequences were respectively used as negative and positive  
167 controls. DNA was preserved in a –80 °C refrigerator for the downstream treatments.

#### 168 **SCFAs quantification**

169 Fecal samples of piglets were pretreated (three sample repetitions for each treatment)  
170 according to the method of zijlstra and colleagues [33]. Using 4-methylisovaleric acid  
171 as an internal standard, the concentrations of fecal SCFAs were determined by gas  
172 chromatography.

#### 173 **Total protein extraction and mass spectrometry analysis**

174 Approximately 0.3g fecal samples of each group are used for the extraction of total  
175 protein according to the method of haange and co-authors [34]. The protein extracts  
176 were separated and purified using sodium dodecyl sulfate-polyacrylamide gel  
177 electrophoresis (SDS-PAGE), and then the single band cutted in gel state was  
178 digested by trypsin [35, 36]. The desalted peptide assortments were analyzed by the  
179 application of label-free proteomic quantitative techniques on a mass



180 spectrometry-based proteomic research platform (Thermo Scientific™ Orbitrap  
181 Fusion™).

### 182 **Mass spectrometry data analysis**

183 The mass spectrum data were extracted by protein search software (Mascot 2.3.02),  
184 and then the peptides/proteins data were under quality controlled, and identified with  
185 database searching (NCBI RefSeq library and UniProtKB Library) by using Scaffold  
186 Software. Applied "false discovery rate (FDR) < 1.0%" as the screening standard for  
187 target peptides via local FDR algorithm of Scaffold. The intensities obtained from the  
188 experiment were normalized within all acquisition runs. Use "fold change  $\geq 1.5$  and  $P$   
189 < 0.05" as the standard of screening differential proteins.

### 190 **Bioinformatics analysis**

191 All quantified peptides were subjected to Unipept 4.0 for taxonomic assignment based  
192 on the principle of Lowest Common Ancestor (LCA) [37]. Cluster of Orthologous  
193 Groups of proteins (COGs) is used to functionally classify different bacterio-proteins.  
194 The abundance of each category consisted of the sum of the protein intensities of all  
195 COGs in the category. Ultimately, the identified COGs were applied to the Kyoto  
196 Encyclopedia of Genes and Genomes (KEGG) metabolic pathway website  
197 (<https://www.kegg.jp/>) for downstream analysis.

### 198 **Statistical analysis**

199 Data were analyzed via one-way ANOVA using SPSS 19.0 software (IBM Corp.,  
200 New York, NY, United States). Data are presented as means  $\pm$  S.D., and differences  
201 were regarded as statistically significance at  $P < 0.05$ . Venn diagram analysis was

202 performed to present unique and shared OTUs in the fecal microbiome among four  
203 treatment groups. Heatmap was generated with the R-package gplots at the genus  
204 level.

## 205 **Results**

### 206 **Microbiota composition and diversity**

207 After the raw paired-end reads were quality filtered and assembled, 458,016 effective  
208 sequences were obtained from 12 piglet's fecal specimens. A mean of 38,168 reads  
209 per sample were acquired with iSeq 100 (illumina) after sequencing the V3-V4 region  
210 of the 16S rRNA gene from fresh feces. A total of 573 OTUs (Fig. 1) which were  
211 grouped in 18 Phyla, 43 Classes, 105 Orders, 180 Families and 410 Genera.

### 212 **Bacterial alpha diversity analysis**

213 The coverage of sequencing in the samples is over 99.9%. Table 2 showed the  
214 diversity indexes of fecal microorganisms among four dietary treatment groups (NCG,  
215 FCRPG, CRPG, and PCG).

216 The Simpson diversity indices of NCG was obtained a lower value than three  
217 additional groups (FCRPG, CRPG, and PCG). According to the formula of Simpson's  
218 diversity index:  $D = \frac{1}{1 - \sum_{i=1}^S P_i^2} = \frac{1}{1 - \sum_{i=1}^S \left(\frac{N_i}{N}\right)^2}$ , the Simpson diversity indices  
219 (represented with the letter 'D') is positively correlated to species amount (represented  
220 with the letter 'S') and species evenness index. Therefore, NCG had the lowest values  
221 of species amount and species evenness compared to three additional treatment  
222 groups. Similarly, the Shannon-Weiner index primarily reflects the species diversity  
223 of bacterial community. The relative lowest value of Shannon-Weiner index acquired

224 in NCG indicated that FCRPG, CRPG and PCG had higher bacterial diversity index  
225 values, which illustrating FCRP, CRP and compound antibiotics are capable of  
226 improving the bio-diversity of intestinal microorganisms to a certain degree.

227 Overall, there is no significant difference measured in fecal microbial diversity  
228 indexes among dietary treatment groups (NCG, FCRPG, CRPG, and NCG) ( $P > 0.05$ ).  
229 However, these data still indicated that the inclusions of FCRP, CRP and compound  
230 antibiotics to the diet all have modulated the fecal microorganisms of weaned piglets,  
231 resulting in modifications of fecal microbial diversity indexes, which in turn affects  
232 the health growth of weaned piglets.

### 233 **Venn diagram analysis**

234 The Venn Diagram showed that the unique and shared OTUs of fecal microbiota for  
235 weaning piglets among four treatment groups (NCG, FCRPG, CRPG and PCG).  
236 Obviously, significant overlap patterns were observed between any two groups (NCG  
237 and FCRPG, NCG and CRPG, FCRPG and CRPG, NCG and PCG) (**Fig. 1**). Among  
238 which, 269 OTUs are shared by NCG and FCRPG (**Fig. 1B**), 287 OTUs are shared by  
239 NCG and CRPG (**Fig. 1A**), 316 OTUs are shared by FCRPG and CRPG (**Fig. 1C**),  
240 while 263 OTUs are shared by NCG and PCG (**Fig. 1D**). This illustrated that the  
241 majority of common OTUs (234 out of 573) may probably be the permanent residents  
242 of rectum of weaned piglets (**Fig. 1E**). Among 573 OTUs, NCG owned only 6 unique  
243 OTUs, while FCRPG, CRPG and PCG had 55, 78 and 34 unique OTUs, respectively.  
244 These indicated that FCRPG, CRPG and PCG increased their respective fecal  
245 microbiota diversities in varying degrees compared with NCG. Specially, some parts

246 of bacterial OUTs derived from dietary supplementation of FCRP or CRP may pass  
247 through the whole intestinal tract of piglets, and thus eventually appear in their feces,  
248 as a consequence of the digestive system and immune system of weaning piglets are  
249 relatively functionally imperfect. In addition, there are also evidences showed that the  
250 intervention of compound antibiotics can disturb the intestinal microbiota  
251 composition with numerous possible outcomes in swines [38, 39]. Here in our  
252 experiment, a slight increase of fecal microbial abundance was observed in weaned  
253 piglets which fed diet contained a certain amount of antibiotics.

#### 254 **Thermal imagine analysis**

255 Some certain indigenous bacterial genera of feces were correlated with altered dietary  
256 ingredients. As shown in Fig. 2, heatmap analyses of the relative abundance of fecal  
257 microorganisms were displayed at the genus level. Among four treatment groups, the  
258 genus *Prevotella* presents similar high abundance (bright green band), while the genus  
259 *Bilophila* (especially *Bilophila wadsworthia*), which has been reported to trigger  
260 inflammatory bowel disease in mouse models [40], exhibits similar low abundance (red  
261 band).

#### 262 **Taxonomic classification of fecal bacteria**

263 As shown in Fig. 3, the effects on fecal microorganisms of weaned piglets of four  
264 dietary groups (NCG, FCRPG, CRPG, and PCG) at the genus (Fig. 3c), family (Fig.  
265 3b) and phylum (Fig. 3a) levels. From the horizontal point of view, the stacked bar  
266 plots clearly showed the relative percentage contents of fecal microbes at each genus,  
267 family and phylum levels. According to the sequencing data, the *Lactobacillus*,

268 Lactococcus, Prevotella, Acidobacterium, Streptococcus, Micrococcus of four  
269 treatment groups were compared longitudinally (Fig. 4). Collectively, FCRP has  
270 obviously increased the relative abundance of Lactobacillus and Acidobacterium in  
271 piglets' feces, and decreased the relative abundance of Streptococcus, while CRP has  
272 obviously increased the relative percentage of Lactococcus and Prevotella. In the  
273 present trial, these two dietary additives (FCRP and CRP) are particularly associated  
274 with changes in the number of Lactobacillus, Lactococcus, Micrococcus and  
275 Streptococcus in the feces of weaned piglets. In addition, the compound antibiotics  
276 can also disturb the microbial memberships in the feces of piglets. Consequently,  
277 there is a certain corresponding relationship between specific dietary components and  
278 specific types of microbial flora.

### 279 **Analysis of the fecal microbial metabolites in weaned piglets**

280 The fecal SCFAs profiles in weaned piglets is given in Table 3, which presenting the  
281 concentration of total SCFAs and its components in feces. There were significant  
282 differences ( $P < 0.05$ ) in the concentrations of acetic acid, propionic acid, butyric acid  
283 and total SCFA between FCRPG and three additional groups. Significant differences  
284 ( $P < 0.05$ ) also found in the contents of acetic acid and total SCFAs between CRPG  
285 and NCP. However, no significant differences ( $P > 0.05$ ) of propionic acid and  
286 butyric acid between CRPG and NCP.

### 287 **Mass spectrometry analysis of fecal proteomics**

288 In this study, 2540 non-redundant proteins were identified, including 2,465 bacterial  
289 proteins (97.05%) and 75 pigling's proteins (2.95%). Proteins/peptides having two or

290 more peptide segments are artificially classified as "the effective proteins". Based on  
291 such principle, 1,871 proteins were identified, 1812 of which were from bacteria  
292 (96.85%), and 59 from piglets (3.23%), excluding possible contaminants. Using "fold  
293 change  $\geq 1.5$  and  $P < 0.05$ " as the standard of filtering differential proteins, 241  
294 differently expressed proteins in total were identified, of which 230 (95.43%) are  
295 from fecal bacteria and 11 (4.56%) are from piglets.

296 In addition, a total of 5,106 peptides were identified, of which 4,850 were bacterial  
297 peptide segments. Peptides that belonging to the 230 differential bacterial proteins  
298 were artificially divided into significantly changed bacterial peptides. According to  
299 this standard, comparing with the initial blank samples at day 0, a total of 953  
300 differential bacterial peptide segments were obtained, of which, 513 peptide segments  
301 (53.83%) were up-regulated and 440 (46.16%) were down-regulated. The distribution  
302 of these up-regulated and down regulated bacterial peptide segments among dietary  
303 treatment groups was shown in [Fig. 5](#).

#### 304 **Analysis of the function of COGs of fecal bacteria proteins**

305 As shown in [Fig. 6](#), a total of 230 bacterial proteins in four treatment groups (NCG,  
306 FCRPG, CRPG and PCG) were assigned into 20 COGs. Among them, four  
307 predominant abundant functional categories are in turn as follows: B. Carbohydrate  
308 transport and metabolism, H. Energy production and conversion; I. Function unknown;  
309 T. Translation, ribosomal structure and biogenesis. In four treatment groups, FCRPG  
310 has the largest number of proteins that associated with the function of carbohydrate  
311 transport and metabolism, while CRPG contained the highest amount of proteins

312 related to secondary metabolites biosynthesis, transport and catabolism.

### 313 **KEGG pathway analysis of fecal bacterial proteins**

314 Pathway-related annotation and analysis promote the in-depth understanding of  
315 biological function of identified proteins [2, 36]. In present study, the commercial  
316 KEGG database (<https://www.kegg.jp/>) was applied to annotate all of 230 differential  
317 bacterial proteins to extract functional informations. In accordance with the number of  
318 proteins involved in each pathway, 16 relatively major metabolic pathways were  
319 identified (Fig. 7). These pathways are mainly associated with fatty acid metabolism,  
320 sugar metabolism, carbon metabolism and amino acid metabolism, etc. KEGG  
321 functional analysis showed that, among four dietary treatment groups, there have  
322 same number of functional proteins respectively in DNA replication and purine  
323 metabolism, while different number of proteins were observed in terms of fatty acid  
324 metabolism and butyrate metabolism. Specifically, FCRPG contains the relative  
325 maximum number of proteins pertaining to fatty acid metabolism and gastric acid  
326 secretion, while CRPG has the highest amount of proteins in flavonoid and flavonal  
327 biosynthesis.

### 328 **Discussion**

329 Understanding the critical role of the GI microbiota in host-microbe interactions  
330 during weaning transition in commercial piglets is of a great importance for reducing  
331 the risk of post-weaning infections (weanling piglets' diarrhea) and promoting health  
332 and growth development. Previously published research suggested that gut  
333 microbiome, as a magical bioreactor, provides essential nutrient components like

334 biotin and vitamin K, digests complex dietary fibres, as well as produces active  
335 metabolite SCFAs that nourish the gut epithelia [38]. However, little is still known to  
336 researchers about alimentary microbiome which has been recognized as "microbial  
337 dark matter" before. To our knowledge, the development of inflammatory GI diseases  
338 are obviously linked to alternations of digestive tract microbial communities [41]. On  
339 the other hand, the diversity and development of GI tract microbiome of piglets  
340 during weaning are basically frequently resulted from the changes of diets and  
341 physiological states [42]. Therefore, intestinal microorganisms play a role as a  
342 junction hub from diet intake to host physiological states (health or disease). Recently,  
343 technological advances of various omics data acquired from genomics,  
344 transcriptomics, metabolomics and proteomics have broaden the detailed  
345 investigations of intestinal microbiota for animals [3, 4]. These technologies hold  
346 great promise to provide robust strategies for scientists to elucidate the molecular  
347 mechanisms involved in host-microbial interactions in the complex feces ecosystem  
348 of weaned piglets.

#### 349 **Correlation between functions and structures of fecal microbiome**

350 In animals, microorganisms resided in alimentary canal are involving in food  
351 digestion, nutrient absorption, microbial fermentation and feces excretion. Therefore,  
352 the symbiotic microbita composition and its metabolic constituents have been  
353 considered as important factors for the characterization of GI tract health. In  
354 particularly, the first year of life is significant important in shaping and establishing  
355 the gut microbiota [45] which influencing the future life of animals. In the piglets'



356 feces, Firmicutes and Bacteroidetes are extensively regarded as the dominant phyla,  
357 followed by Proteobacteria and Actinobacteria, however, the abundance and  
358 composition of bacterial phyla was fluctuated and impacted by several determinants  
359 [46].

360 The diet compositions, to a certain degree, manipulate the composition and  
361 function of enteric microbiome. Specific microbial species/genus tend to be  
362 responsible for degradation of specific dietary components [47]. For example, two gut  
363 Bacteroides, *B. thetaiotaomicron* and *B. ovatus*, are capable to degradate almost all  
364 the main plant and host polysaccharides, including other microbial indigestible  
365 rhamnogalacturonan II [48]. Simultaneously, there also exists synergistic effects  
366 among the different bacteria genus. For example, *Escherichia coli* create an anaerobic  
367 circumstance beneficial to the colonized establishment of other bacterial species such  
368 as Bacteroides, *Lactobacillus* and *Clostridium* [49]. According to our data, FCRPG  
369 have a relative highest abundance of Acidobacterium in feces, followed by CRPG,  
370 compared with NCG and PCG, which suggest that dietary inclusion of FCRP or CRP  
371 could increase the contents of Acidobacterium to optimize the intracavity  
372 environment of GI tract. In addition, the function category analysis of COGs show  
373 that FCRPG present a relative highest percentage value in the category of  
374 carbohydrate transport and metabolism, which hint that FCRP probably have an  
375 enhanced capability of strengthening the sugar metabolism.

#### 376 **Bacteria-produced metabolite SCFAs**

377 SCFAs play an important role on improving intestinal health in pigs [50]. It has been

378 reported that SCFAs (e.g., acetate, propionate and butyrate) as end molecules derived  
379 from metabolism of soluble fibers by commensal microbiota exert multiple influences  
380 on gut morphology and function [51].

381 Butyrate that mainly produced by clusters IV and XIVa of Clostridia via the  
382 butyryl-CoA/acetate-CoA transferase enzyme, is preferentially used as an effective  
383 energy source for colonic epithelial cells, and play role in maintaining the intestinal  
384 homeostasis through multiple mechanism [52]. A remarkable decrease in butyrate  
385 production of gut microbiota is usually associated with certain functional disorders.  
386 For example, Fabry disease is often attributed to the accumulation of  
387 globotriaosylsphingosine (lyso-Gb3) which alters the formation of SCFAs, resulting  
388 in a significant reduction in butyrate concentration [53]. The present study recorded  
389 the significant highest fecal butyrate concentration ( $P < 0.05$ ) in FCRPG, and the  
390 second highest value ( $P < 0.05$ ) was observed in CRPG, which means that dietary  
391 supplemented with FCRP or CRP can evidently increase epithelial energy supply and  
392 maintain normal cellular proliferation and differentiation.

393 Propionate is mainly metabolized in the liver through gluconeogenesis, and as a  
394 potent growth stimulator for certain bacteria (e.g., Bifidobacterium). In addition,  
395 propionate has been shown to be able to bind to several receptors (e.g., GPR41 and  
396 GPR43) [51]. A new study found that propionic can serve as a powerful medicinal  
397 immunomodulatory supplement for multiple sclerosis patients in virtue of its  
398 normalization of Treg cell mitochondrial function and morphology in multiple  
399 sclerosis [54].

400 Acetate is widely produced by various bacterial taxa in mammalian gut. Both  
401 endogenous and indogenous, acetate has a beneficial effect on the function of host  
402 epithelial cells [55]. Previously, Lawhon et al. (2003) discovered that acetate can  
403 function as an inducer of invasion gene expression via a BarA/SirA-independent  
404 pathway [56, 57]. Recent study has pointed out that acetate fight against RSV-induced  
405 disorders via a mechanism of participating in activation of the membrane receptor  
406 GPR43 [58].

407 Associated metabolics study suggested that a reduced production of SCFAs has  
408 seen in antibiotic-treated mice and humans [59]. In our study, a significant decline of  
409 SCFAs content ( $P < 0.05$ ) was observed in antibiotic intervention group (PCG)  
410 compared to FCRPG and CRPG, while no significant difference ( $P > 0.05$ ) was  
411 observed when contrast to NCG.

#### 412 **Bacteria-produced metabolite flavonoids**

413 Flavonoid metabolism has been increasingly recognized for their crucial role in gut  
414 micro-bacteria. The composition of gut microbiota might be an important factor that  
415 affecting absorption of flavonoid-derived compounds by the animal host [60]. Four  
416 bacterial phyla (Actinobacteria, Firmicutes, Bacteroidetes, and Proteobacteria) are  
417 implicated in the bio-conversion of flavonoids, of which majority of bacterial species  
418 are capable of carrying out the O-deglycosylation of flavonoids for flavonoid  
419 transformation [61]. On the other hand, study in mouse models suggested that  
420 exogenous flavonoids intake can counteract the increased capacity of the microbiome  
421 to metabolize flavonoids, and do not hinder the anti-obesity functions of flavonoids in

422 vivo [62]. Therefore, nutrition strategy is so important for modulating the intestinal  
423 microbial structure and thus result in regulating the level of metabolite flavonoids to  
424 maintain the health of animals. In present investigation, KEGG pathways analyses  
425 showed that CRPG has a highest number of bacterial proteins associated with flavone  
426 and flavonol biosynthesis, followed by FCRPG, compared to NCG and PCG.

427 Taken together, FCRP or CRP not only directly modulate the physicochemical  
428 characteristics of the digesta which interacting with intestinal mucosa, but also as the  
429 new growth substrates for particular microbacterial species so as to be beneficial for  
430 the health of weaned piglets.

## 431 **Conclusion**

432 Essentially, CRP used in this work as a medical herb to exert its efficacy. FCRP can  
433 be considered as a kind of combination of prebiotics and probiotics. This study  
434 indicate that dietary inclusion of product of *Citrus reticulata* "Chachi" (FCRP or CRP)  
435 not only drives the alterations of fecal microbes populations but also modulates the  
436 microbial metabolic profiles to ameliorate the intestinal immune functions, which  
437 contributing to decode the biochemical mechanism of FCRP or CRP that beneficial to  
438 intestinal health of weaned piglets.

439 The utilizations of CRP-based herb compound recipe (e.g., Chenpisan) for  
440 promoting health and preventing diseases have been commercialized in swine  
441 production of China. Viewed from our observations, FCRP are capable to stimulate  
442 the appetite, while CRP can improve the carcass quality meat quality. Our results  
443 show that both FCRP and CRP, acting as antibiotic alternatives, modulate the

444 microflora composition, microbiome phylotypes, and fecal microbial metabolites in  
445 their respective modes of action. This study may provide fundamental theoretical  
446 basis for the applications of FCRP or CRP in modulating microbiota of weaned  
447 piglets to facilitate health. Moreover, more studies are needed to carry out on  
448 combining diversified traditional Chinese herbal medicine to enhance the biological  
449 nutrition effect of FCRP or CRP so as to beneficial to piglets nursing. Finally, it  
450 should be noted that further directions to dissect the molecular mechanism in which  
451 how these medicinal plant products interaction with intestinal micro-ecosystem of  
452 piglets is of great significance to the national swine production.

### 453 **Declaration of competing interest**

454 The authors declare that there are no conflicts of interest.

### 455 **Acknowledgments**

456 This investigation was supported in part by grants from the National Key Research  
457 and Development Plan (2016YFD0500600), National Key R & D Program Projects  
458 (2017YFF0104904), and Guangdong Provincial Science and Technology Plan Project  
459 (2017B020207004). Additionally, we thank Ph.D. student Xusheng Li for offering  
460 assistances in drawing figures.

### 461 **References**

- 462 1. Lin H, He QY, Shi L, Sleeman M, Baker MS, et al. Proteomics and the  
463 microbiome: pitfalls and potential. *Expert Rev Proteomics*. 2019; 16: 501–511.  
464 doi: 10.1080/14789450.2018.1523724

- 465 2. Tang Y, Underwood A, Gielbert A, Woodward MJ, Petrovska L. Metaproteomics  
466 Analysis Reveals the Adaptation Process for the Chicken Gut Microbiota. *Applied*  
467 & *Environmental Microbiology*. 2014; 80: 478–485. doi:10.1128/AEM.02472-13
- 468 3. Rothschild D, Weissbrod O, Barkan E, Kurilshikov A, Korem T, et al. Environment  
469 dominates over host genetics in shaping human gut microbiota. *Nature*. 2018; 555:  
470 210–215. doi:10.1038/nature25973
- 471 4. Yang Y, Lee KY, Kim IH .Effects of dietary protected organic acids on growth  
472 performance, nutrient digestibility, fecal microflora, diarrhea scores and fecal gas  
473 emission in weanling pigs. *Canadian Journal of Animal Science*. 2019;  
474 doi:10.1139/cjas-2018-0159
- 475 5. Gresse R, Chaucheyras-Durand F, Fleury MA, Van de Wiele T, Forano E, et al.  
476 Gut Microbiota Dysbiosis in Postweaning Piglets: Understanding the Keys to  
477 Health. *Trends Microbiol*. 2017; 25: 851-873. doi:10.1016/j.tim.2017.05.004
- 478 6. Frese SA, Parker K, Calvert CC, Mills DA. Diet shapes the gut microbiome of pigs  
479 during nursing and weaning. *Microbiome*. 2015; 3: 28. doi:  
480 10.1186/s40168-015-0091-8
- 481 7. Maltecca C, Bergamaschi M, Tiezzi F. The interaction between microbiome and  
482 pig efficiency: A review. *J Anim Breed Genet*. 2020; 137: 4–13. doi:  
483 10.1111/jbg.12443
- 484 8. Wang W, Hu H, Zijlstra RT, Zheng J, Ganzle MG. Metagenomic reconstructions of  
485 gut microbial metabolism in weanling pigs. *Microbiome*. 2019; 7: 48.  
486 doi:10.1186/s40168-019-0662-1

- 487 9. Diana A, Manzanilla EG, Calderon Diaz JA, Leonard FC, Boyle LA. Do weaner  
488 pigs need in-feed antibiotics to ensure good health and welfare? PLoS One. 2017;  
489 12: e0185622. doi:10.1371/journal.pone.0185622
- 490 10. Guevarra RB, Hong SH, Cho JH, Kim BR, Shin J, et al. The dynamics of the  
491 piglet gut microbiome during the weaning transition in association with health  
492 and nutrition. J Anim Sci Biotechnol. 2018; 9: 54.  
493 doi:10.1186/s40104-018-0269-6
- 494 11. Barba-Vidal E, Martin-Orue SM, Castillejos L. Review: Are we using probiotics  
495 correctly in post-weaning piglets? Animal. 2018; 12: 2489–2498. doi:  
496 10.1017/S1751731118000873
- 497 12. Dong X, Zhang N, Zhou M, Tu Y, Deng K, et al. Effects of dietary probiotics on  
498 growth performance, faecal microbiota and serum profiles in weaned piglets.  
499 Animal Production Science. 2014; 54: 616. doi:10.1071/an12372
- 500 13. Konstantinov SR, F. FC, Yun ZW, A. WB, Jeannette K, et al. Microbial diversity  
501 studies of the porcine gastrointestinal ecosystem during weaning transition.  
502 Animal Research. 2004; 53: 317–324. doi:10.1051/animres:2004019
- 503 14. Moset V, Piquer O, Cervera C, Fernández CJ, Hernández P, et al. Ensiled citrus  
504 pulp as a by-product feedstuff for finishing pigs: nutritional value and effects on  
505 intestinal microflora and carcass quality. Spanish Journal of Agricultural  
506 Research. 2015; 13: e0607. doi:10.5424/sjar/2015133-6717
- 507 15. O'Sullivan TC, Lynch PB, Morrissey PA, O'Grady JF. Evaluation of citrus pulp in  
508 diets for sows and growing pigs. Irish Journal of Agricultural & Food Research.

- 509 2003; 42: 243–253. doi:10.1016/S0168-1699(03)00049-8
- 510 16. Cerisuelo, A, CastellóL, Moset, V, Martínez M, Hernández P, & Piquer, O, et al.  
511 The inclusion of ensiled citrus pulp in diets for growing pigs: effects on voluntary  
512 intake, growth performance, gut microbiology and meat quality. *livestock*  
513 *science*. 2010; 134(1-3), 0–182. doi:10.1016/j.livsci.2010.06.135
- 514 17. Thumann TA, Pferschy-Wenzig EM, Moissl-Eichinger C, Bauer R. The role of  
515 gut microbiota for the activity of medicinal plants traditionally used in the  
516 European Union for gastrointestinal disorders. *J Ethnopharmacol*. 2019; 245:  
517 112153. doi:10.1016/j.jep.2019.112153
- 518 18. Fu M, Xu Y, Chen Y, Wu J, Yu Y, et al. Evaluation of bioactive flavonoids and  
519 antioxidant activity in Pericarpium Citri Reticulatae (*Citrus reticulata* 'Chachi')  
520 during storage. *Food Chem*. 2017; 230: 649–656.  
521 doi:10.1016/j.foodchem.2017.03.098
- 522 19. Xu JJ, Wu X, Li MM, Li GQ, Yang YT, et al. Antiviral activity of  
523 polymethoxylated flavones from "Guangchenpi", the edible and medicinal  
524 pericarps of *Citrus reticulata* 'Chachi'. *J Agric Food Chem*. 2014; 62: 2182–2189.  
525 doi: 10.1021/jf404310y
- 526 20. Yu X, Sun S, Guo Y, Liu Y, Yang D, et al. *Citri Reticulatae* Pericarpium  
527 (Chenpi): Botany, ethnopharmacology, phytochemistry, and pharmacology of a  
528 frequently used traditional Chinese medicine. *J Ethnopharmacol*. 2018; 220:  
529 265–282. doi:10.1016/j.jep.2018.03.031
- 530 21. Duan L, Dou LL, Yu KY, Guo L, Bai-Zhong C, et al. Polymethoxyflavones in



- 531 peel of *Citrus reticulata* 'Chachi' and their biological activities. *Food Chem.* 2017;  
532 234: 254–261. doi:10.1016/j.foodchem.2017.05.018
- 533 22. Fu M, Zou B, An K, Yu Y, Tang D, et al. Anti-asthmatic activity of alkaloid  
534 compounds from *Pericarpium Citri Reticulatae* (*Citrus reticulata* 'Chachi'). *Food*  
535 *Funct.* 2019; 10: 903–911. doi:10.1039/c8fo01753k
- 536 23. Lv X, Zhao S, Ning Z, Zeng H, Shu Y, et al. Citrus fruits as a treasure trove of  
537 active natural metabolites that potentially provide benefits for human health.  
538 *Chem Cent J.* 2015; 9: 68. doi:10.1186/s13065-015-0145-9
- 539 24. Morrow R, Deyhim F, Patil BS, Stoecker BJ. Feeding orange pulp improved bone  
540 quality in a rat model of male osteoporosis. *J Med Food.* 2009; 12: 298–303.  
541 doi:10.1089/jmf.2008.0145
- 542 25. Lanza M, Scerra M, Bognanno M, Buccioni A, Cilione C, et al. Fatty acid  
543 metabolism in lambs fed citrus pulp. *Journal of Animal Science.* 2015; 93: 3179.  
544 doi:10.2527/jas.2014-8708
- 545 26. Agócs A, Nagy V, Szabó Z, Márk L, Ohmacht R, et al. Comparative study on the  
546 carotenoid composition of the peel and the pulp of different citrus species.  
547 *Innovative Food Science & Emerging Technologies.* 2007; 8: 390–394. doi:  
548 10.1016/j.ifset.2007.03.012
- 549 27. Barros HRDM, Ferreira TA, Genovese MI. Antioxidant capacity and mineral  
550 content of pulp and peel from commercial cultivars of citrus from Brazil. *Food*  
551 *Chem.* 2012; 134: 1892–1898. doi:10.1016/j.foodchem.2012.03.090
- 552 28. Chen M, Jiang Q, Yin X-R, Lin Q, Chen J-Y, et al. Effect of hot air treatment on

- 553 organic acid- and sugar-metabolism in Ponkan (*Citrus reticulata*) fruit. *Scientia*  
554 *Horticulturae*. 2012; 147: 118–125. doi: 10.1016/j.scienta.2012.09.011
- 555 29. Asres DT, Nana A, Nega G. Complementary feeding and effect of spontaneous  
556 fermentation on anti-nutritional factors of selected cereal-based complementary  
557 foods. *BMC Pediatr*. 2018; 18: 394. doi:10.1186/s12887-018-1369-3
- 558 30. NRC (2012) *Nutrient Requirements of Swine*. (11th Edn). Washington, DC:  
559 National Academy Press.
- 560 31. Chen L, Xu Y, Chen X, Fang C, Zhao L, et al. The Maturing Development of Gut  
561 Microbiota in Commercial Piglets during the Weaning Transition. *Front*  
562 *Microbiol*. 2017; 8: 1688. doi:10.3389/fmicb.2017.01688
- 563 32. Walsh PS, Varlaro J, Reynolds R. A rapid chemiluminescent method for  
564 quantitation of human DNA. *Nucleic Acids Research*. 1992; 20: 5061–5065. doi:  
565 10.1093/nar/20.19.5061
- 566 33. Zijlstra JB, Beukema J, Wolthers BG, Byrne BM, Groen A, et al. Pretreatment  
567 methods prior to gaschromatographic analysis of volatile fatty acids from faecal  
568 samples. *Clin Chim Acta*. 1977; 78: 243–250. doi:  
569 10.1016/0009-8981(77)90312-6
- 570 34. Haange SB, Oberbach A, Schlichting N, Hugenholtz F, Smidt H, et al.  
571 Metaproteome analysis and molecular genetics of rat intestinal microbiota reveals  
572 section and localization resolved species distribution and enzymatic  
573 functionalities. *J Proteome Res*. 2012; 11: 5406–5417. doi:10.1021/pr3006364
- 574 35. Jehmlich N, Schmidt F, Hartwich M, von Bergen M, Richnow HH, et al.

- 575 Incorporation of carbon and nitrogen atoms into proteins measured by  
576 protein-based stable isotope probing (Protein-SIP). *Rapid Commun Mass*  
577 *Spectrom.* 2008; 22: 2889–2897. doi:10.1002/rcm.3684
- 578 36. Kolmeder CA, Mark dB, Janne N, Ilja R, Jaana Mt, et al. Comparative  
579 Metaproteomics and Diversity Analysis of Human Intestinal Microbiota Testifies  
580 for Its Temporal Stability and Expression of Core Functions. *Plos One.* 2012; 7:  
581 1–14. doi:10.1371/journal.pone.0029913
- 582 37. Tanca A, Palomba A, Fraumene C, Pagnozzi D, Manghina V, et al. The impact of  
583 sequence database choice on metaproteomic results in gut microbiota studies.  
584 *Microbiome.* 2016; 4: 51. doi:10.1186/s40168-016-0196-8
- 585 38. Chassaing B, Kumar M, Baker MT, Singh V, Vijay-Kumar M. Mammalian gut  
586 immunity. *Biomed J.* 2014; 37: 246–258. doi:10.4103/2319-4170.130922
- 587 39. Looft T, Johnson TA, Allen HK, Bayles DO, Alt DP, et al. In-feed antibiotic  
588 effects on the swine intestinal microbiome. *Proc Natl Acad Sci U S A.* 2012; 109:  
589 1691–1696. doi:10.1073/pnas.1120238109
- 590 40. David LA, Maurice CF, Carmody RN, Gootenberg DB, Button JE, et al. Diet  
591 rapidly and reproducibly alters the human gut microbiome. *Nature.* 2014; 505:  
592 559–563. doi:10.1038/nature12820
- 593 41. Chang C, Lin H. Dysbiosis in gastrointestinal disorders. *Best Pract Res Clin*  
594 *Gastroenterol.* 2016; 30: 3–15. doi:10.1016/j.bpg.2016.02.001
- 595 42. Arfken AM, Frey JF, Ramsay TG, Summers KL. Yeasts of Burden: Exploring the  
596 Mycobiome-Bacteriome of the Piglet GI Tract. *Front Microbiol.* 2019; 10: 2286.

597       doi:10.3389/fmicb.2019.02286

598   43. Gerber GK. The dynamic microbiome. *FEBS Lett.* 2014; 588: 4131–4139. doi:  
599       10.1016/j.febslet.2014.02.037

600   44. Tremlett H, Bauer KC, Appel-Cresswell S, Finlay BB, Waubant E. The gut  
601       microbiome in human neurological disease: A review. *Ann Neurol.* 2017; 81:  
602       369–382. doi:10.1002/ana.24901

603   45. Kim J, Nguyen SG, Guevarra RB, Lee I, Unno T .Analysis of swine fecal  
604       microbiota at various growth stages. *Arch Microbiol.* 2015; 197: 753–759. doi:  
605       10.1007/s00203-015-1108-1

606   46. Heinritz SN, Mosenthin R, Weiss E. Use of pigs as a potential model for research  
607       into dietary modulation of the human gut microbiota. *Nutr Res Rev.* 2013; 26:  
608       191–209. doi:10.1017/S0954422413000152

609   47. Rowland I, Gibson G, Heinken A, Scott K, Swann J, et al. Gut microbiota  
610       functions: metabolism of nutrients and other food components. *Eur J Nutr.* 2018;  
611       57: 1–24. doi:10.1007/s00394-017-1445-8

612   48. Martens EC, Lowe EC, Chiang H, Pudlo NA, Wu M, et al. Recognition and  
613       degradation of plant cell wall polysaccharides by two human gut symbionts.  
614       *PLoS Biol.* 2011; 9: 1–16. doi:10.1371/journal.pbio.1001221

615   49. Petri D, Hill JE, Van Kessel AG. Microbial succession in the gastrointestinal tract  
616       (GIT) of the preweaned pig. *Livestock Science.* 2010; 133: 107–109.  
617       doi:10.1016/j.livsci.2010.06.037

618   50. Liu Y. Fatty acids, inflammation and intestinal health in pigs. *J Anim Sci*

- 619 Biotechnol. 2015; 6: 41. doi:10.1186/s40104-015-0040-1
- 620 51. Trompette A, Gollwitzer ES, Yadava K, Sichelstiel AK, Sprenger N, et al. Gut  
621 microbiota metabolism of dietary fiber influences allergic airway disease and  
622 hematopoiesis. *Nat Med.* 2014; 20: 159–166. doi:10.1038/nm.3444
- 623 52. Lee WJ, Hase K. Gut microbiota-generated metabolites in animal health and  
624 disease. *Nat Chem Biol.* 2014; 10: 416–424. doi:10.1038/nchembio.1535
- 625 53. Aguilera-Correa JJ, Madrazo-Clemente P, Martinez-Cuesta MDC, Pelaez C, Ortiz  
626 A, et al. Lyso-Gb3 modulates the gut microbiota and decreases butyrate  
627 production. *Sci Rep.* 2019; 9: 12010. doi:10.1038/s41598-019-48426-4
- 628 54. Duscha A, Gisevius B, Hirschberg S, Yissachar N, Stangl GI, et al. Propionic  
629 Acid Shapes the Multiple Sclerosis Disease Course by an Immunomodulatory  
630 Mechanism. *Cell.* 2020; 180: 1–14. doi: 10.1016/j.cell.2020.02.035
- 631 55. Fukuda S, Toh H, Taylor TD, Ohno H, Hattori M. Acetate-producing  
632 bifidobacteria protect the host from enteropathogenic infection via carbohydrate  
633 transporters. *Gut Microbes.* 2012; 3: 449–454. doi:10.4161/gmic.21214
- 634 56. Lawhon SD, Maurer R, Suyemoto M, Altier C. Intestinal short-chain fatty acids  
635 alter *Salmonella Typhimurium* invasion gene expression and virulence through  
636 BarA/SirA. *Molecular Microbiology.* 2003; 46: 1451–1464. doi:  
637 10.1046/j.1365-2958.2002.03268.x
- 638 57. Antunes LC, McDonald JA, Schroeter K, Carlucci C, Ferreira RB, et al.  
639 Antivirulence activity of the human gut metabolome. *mBio.* 2014; 5:  
640 e01183–01114. doi: 10.1128/mBio.01183-14

- 641 58. Antunes KH, Fachi JL, de Paula R, da Silva EF, Pral LP, et al. Microbiota-derived  
642 acetate protects against respiratory syncytial virus infection through a  
643 GPR43-type 1 interferon response. *Nat Commun.* 2019; 10: 3273. doi:  
644 10.1038/s41467-019-11152-6
- 645 59. Willing BP, Russell SL, Finlay BB. Shifting the balance: antibiotic effects on  
646 host-microbiota mutualism. *Nat Rev Microbiol.* 2011; 9: 233–243. doi:  
647 10.1038/nrmicro2536
- 648 60. Kaakoush NO, Morris MJ. More Flavor for Flavonoid-Based Interventions?  
649 *Trends Mol Med.* 2017; 23: 293–295. doi:10.1016/j.molmed.2017.02.008
- 650 61. Braune A, Blaut M. Bacterial species involved in the conversion of dietary  
651 flavonoids in the human gut. *Gut Microbes.* 2016; 7: 216234. doi:  
652 10.1080/19490976.2016.1158395
- 653 62. Thaïss CA, Itav S, Rothschild D, Meijer MT, Levy M, et al. Persistent  
654 microbiome alterations modulate the rate of post-dieting weight regain. *Nature.*  
655 2016; 540: 544–551. doi:10.1038/nature20796
- 656
- 657
- 658
- 659

660 **Figure legends:**

661 **Fig. 1** The venn diagrams showing the unique and shared OTUs among the four  
662 treatment groups. (A) Between NCG and CRPG, (B) Between NCG and FCRPG, (C)  
663 Between FCRPG and CRPG, (D) Between NCG and PCG, (E) Among four treatment  
664 groups.

665 **Fig. 2** Genus heatmap analyses showing the fecal microbiota memberships in piglets'  
666 feces. The heatmap plot depicts the relative percentage (%) of each fecal bacterial  
667 genera (vertical-axis clustering) within each treatment group (horizon-axis clustering).  
668 The color of the spots in the right panel represents the relative abundance values (%)  
669 of the dominant genera in corresponding treatment group.

670 **Fig. 3** Bar-plot analysis showing fecal microbial community structure of weaned  
671 piglets among four treatment groups at the Phylum, Family and Genus levels. (a)  
672 Barplot at the phylum-level. (b) Barplot at the family-level. (c) Barplot at the  
673 genus-level. Each bar represents the average relative abundance (%) of each bacterial  
674 taxon within per treatment group.

675 **Fig. 4** Influences on the relative abundance of microbiota among dietary treatment  
676 groups. The bar charts shows bacterial taxa that were affected by the dietary  
677 supplement of FCRP or CRP. Bars illustrating the change in relative abundance  
678 between samples collected at day 0 and day 21 for Lactobacillus, Lactococcus,  
679 Prevotella, Acidobacterium, Streptococcus and Micrococcus among four treatment  
680 groups.

681 **Fig. 5** Distribution of bacterial peptide segments showing the number of up-regulated

682 and down-regulated proteins among four dietary treatment groups.

683 **Fig. 6** Analyses of COGs categories showing the functional differences of fecal  
684 bacterial proteins among dietary treatment groups. Note: A. Amino acid transport and  
685 metabolism; B. Carbohydrate transport and metabolism; C. Cell cycle control, cell  
686 division, chromosome partitioning; D. Cell motility; E. Cell wall/membrane/  
687 envelopebiogenesis; F. Coenzyme transport and metabolism; G. Defense mechanisms;  
688 H. Energy production and conversion; I. Function unknow; J. General function  
689 prediction only; K. Inorganic ion transport and metabolism; L. Intracellular trafficking,  
690 secretion, and vesicular transport; M. Lipid transport and metabolism; N. Nucleotide  
691 transport and metabolism; O. Post-translational modification, protein turnover,  
692 chaperones; P. Replication, recombination and repair; Q. Signal transduction  
693 mechanism; R. Secondary metabolites biosynthesis, transport and catabolism; S.  
694 Transcription; T. Translation, ribosomal structure and biogenesis.

695 **Fig. 7** KEGG pathway analyses showing the differential fecal bacterial proteins. Top  
696 16 metabolic pathways of KEGG were selected according to the number of proteins in  
697 corresponding pathway.

698



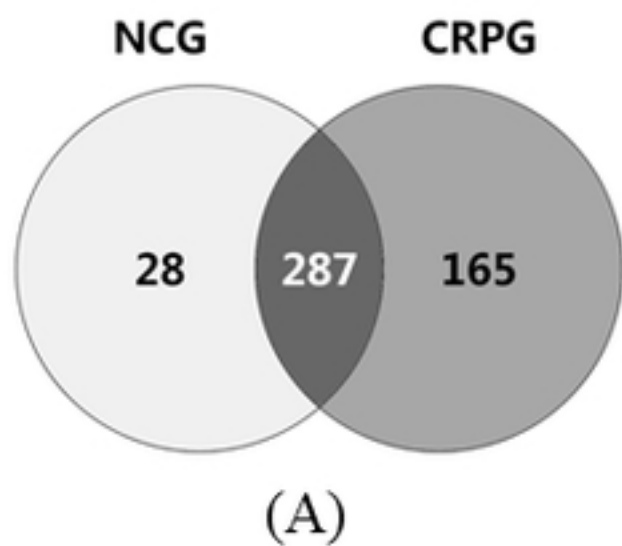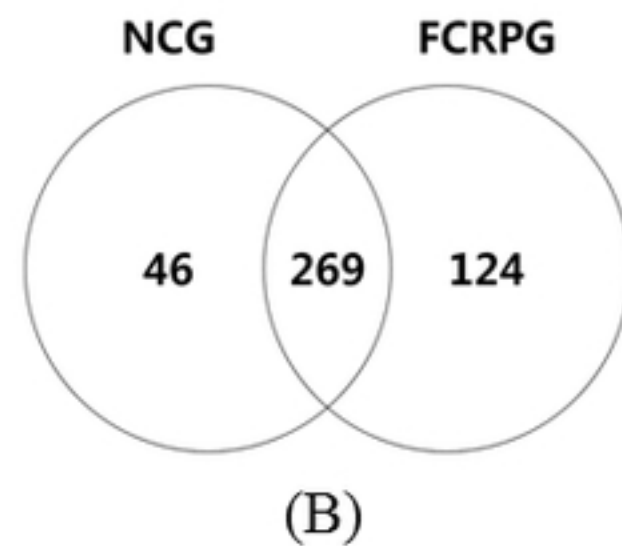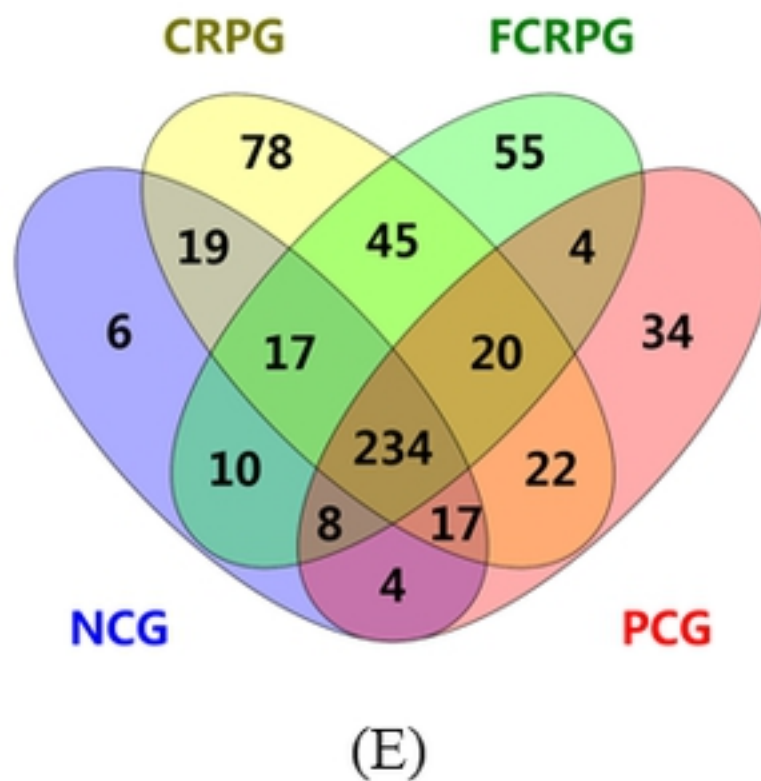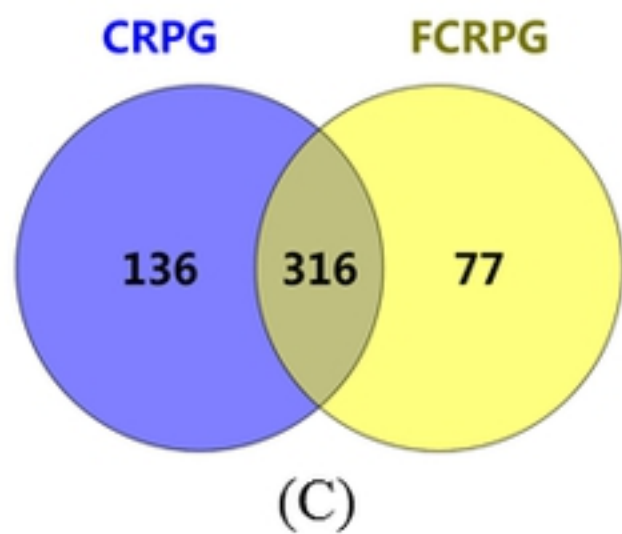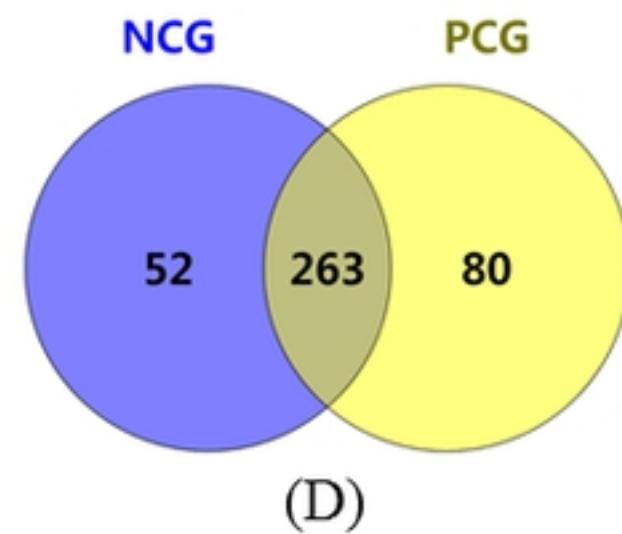

Figure 1

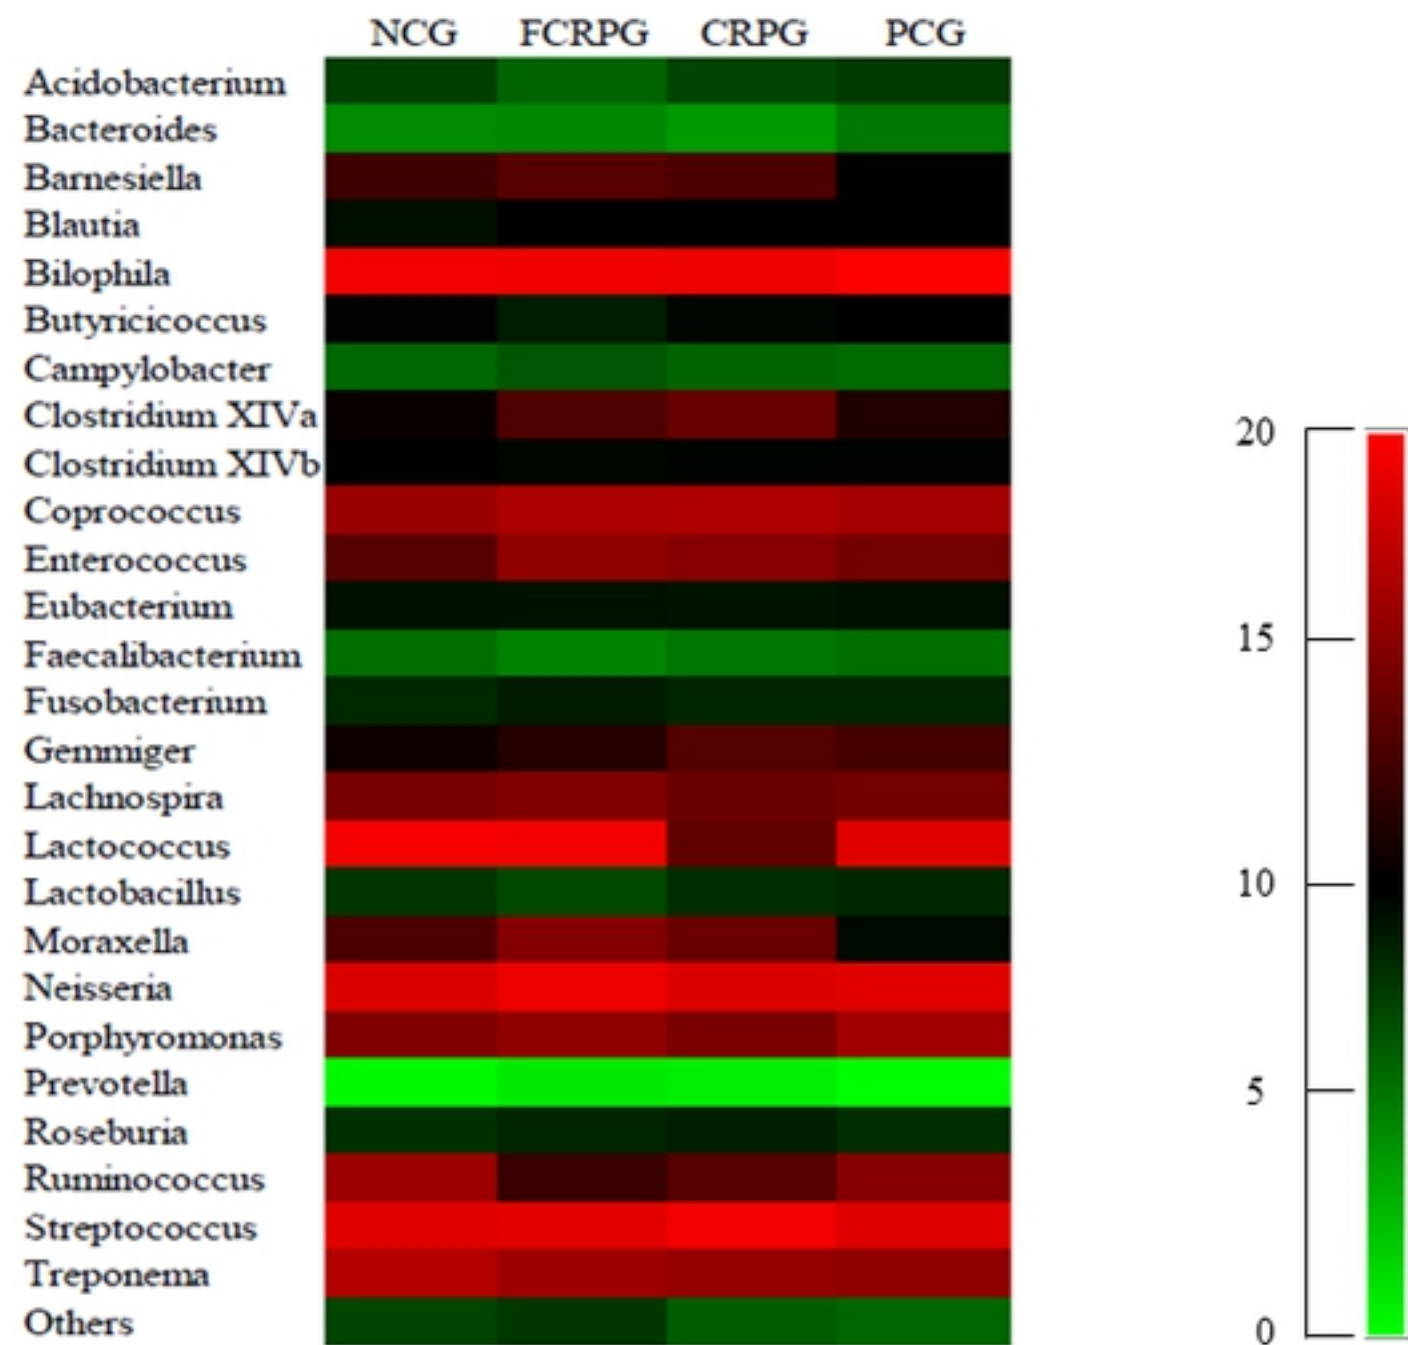

Figure 2

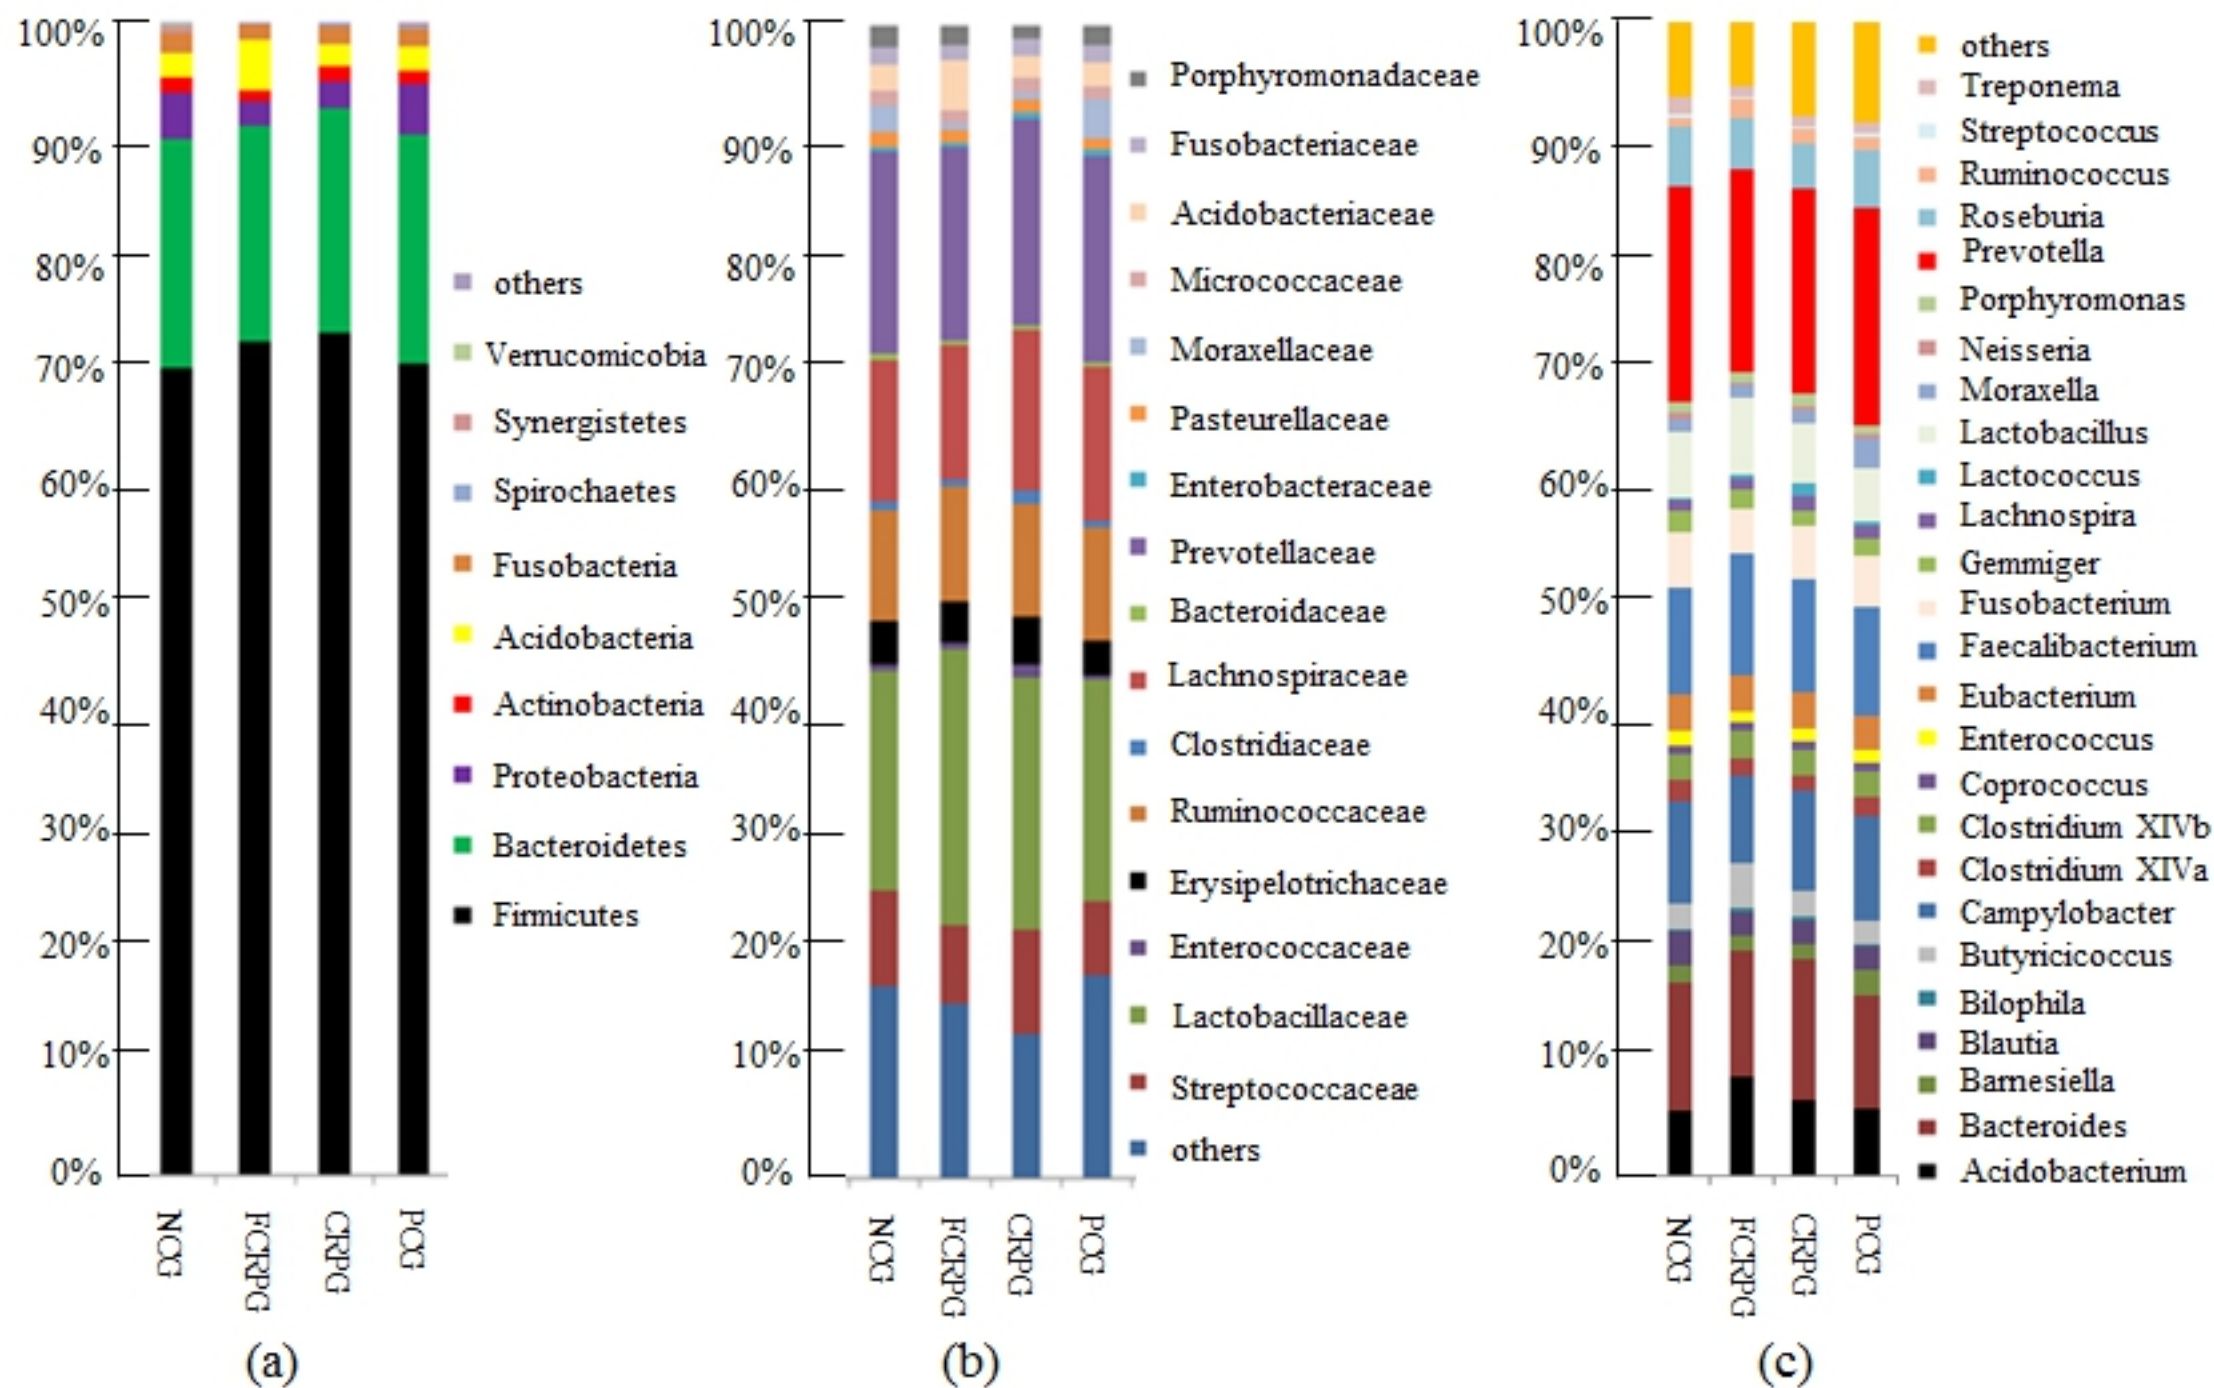

Figure 3

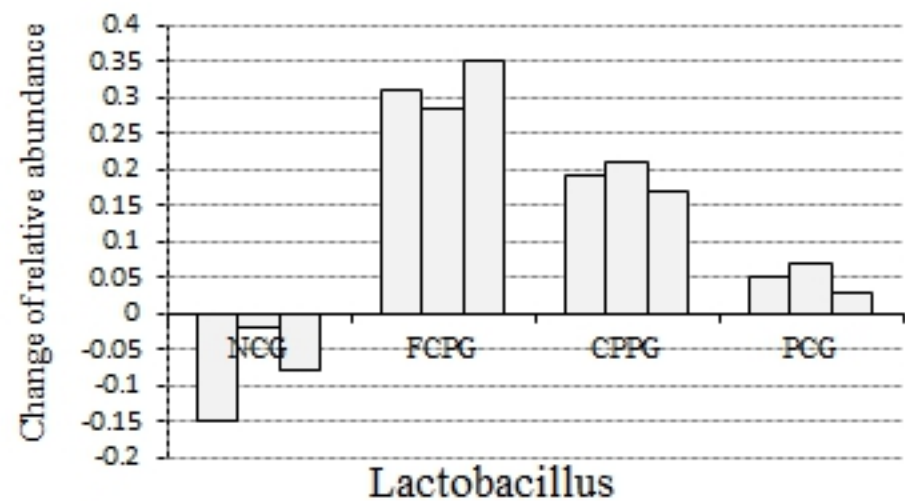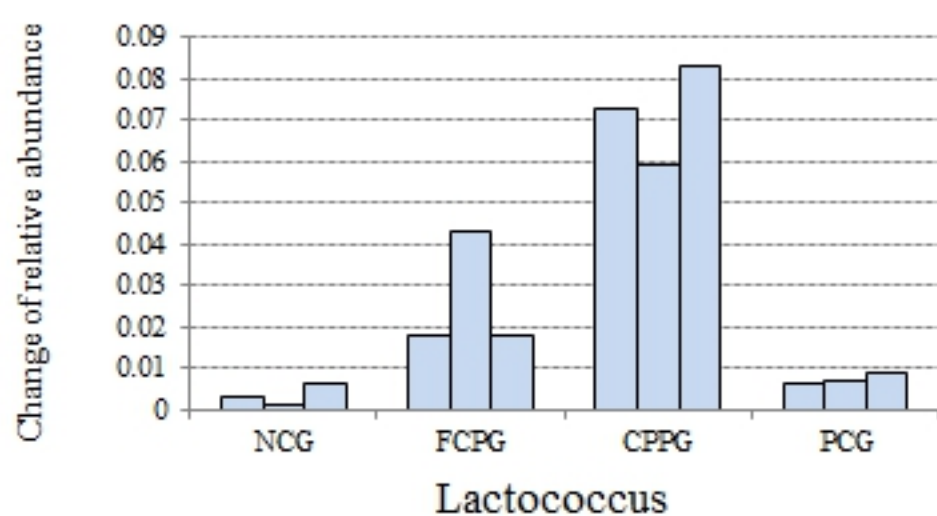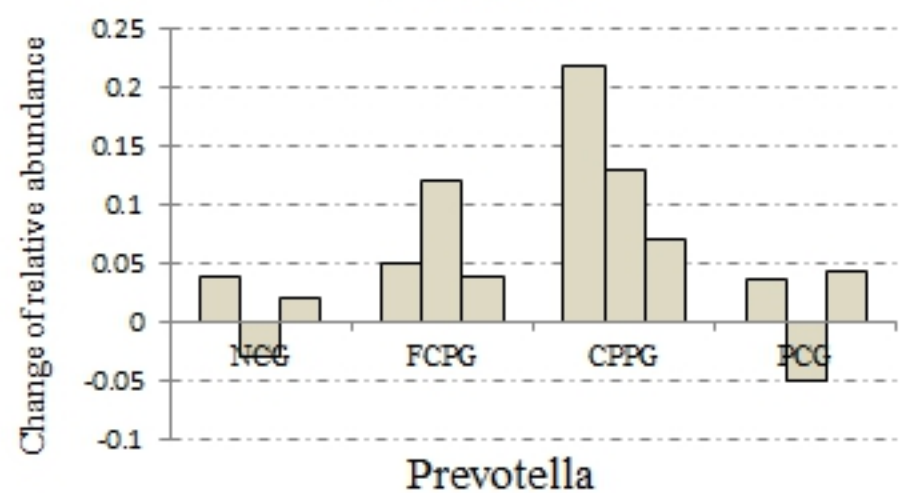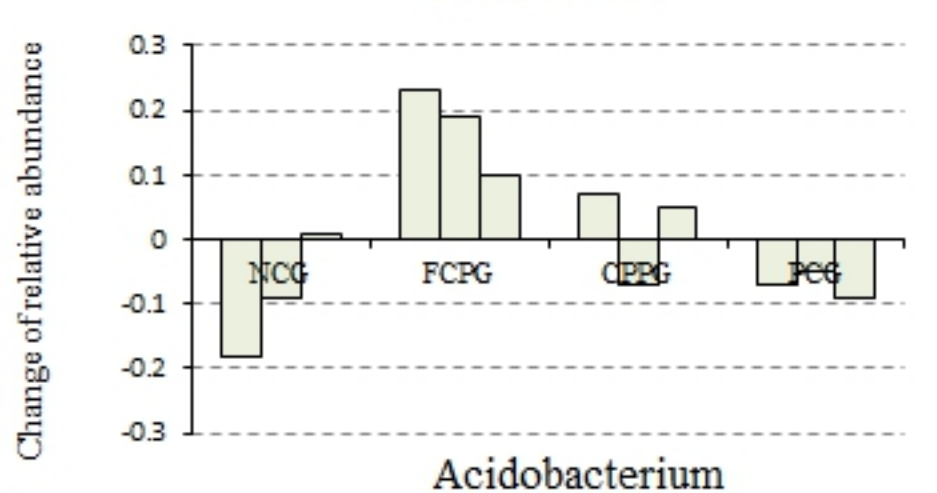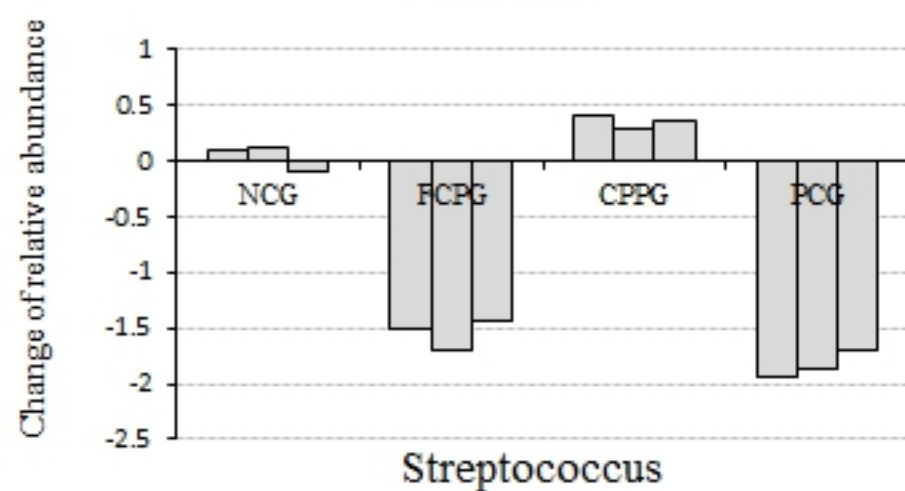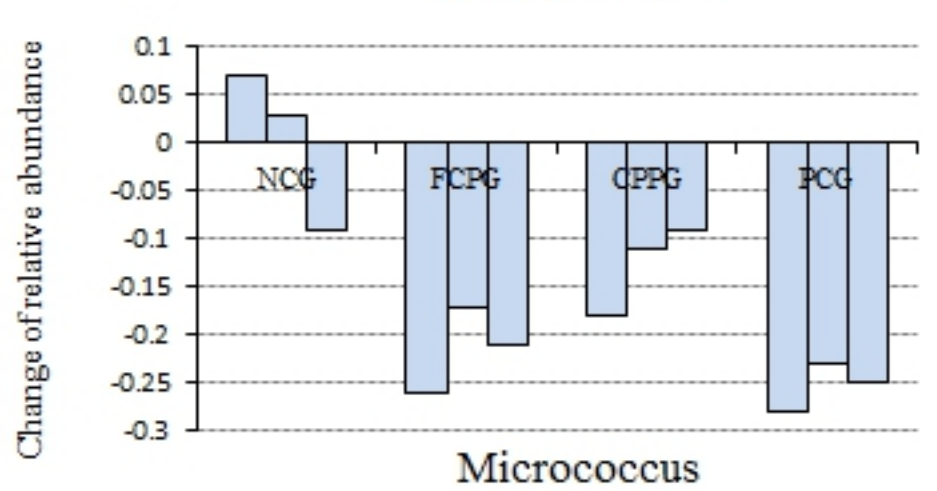

Figure 4

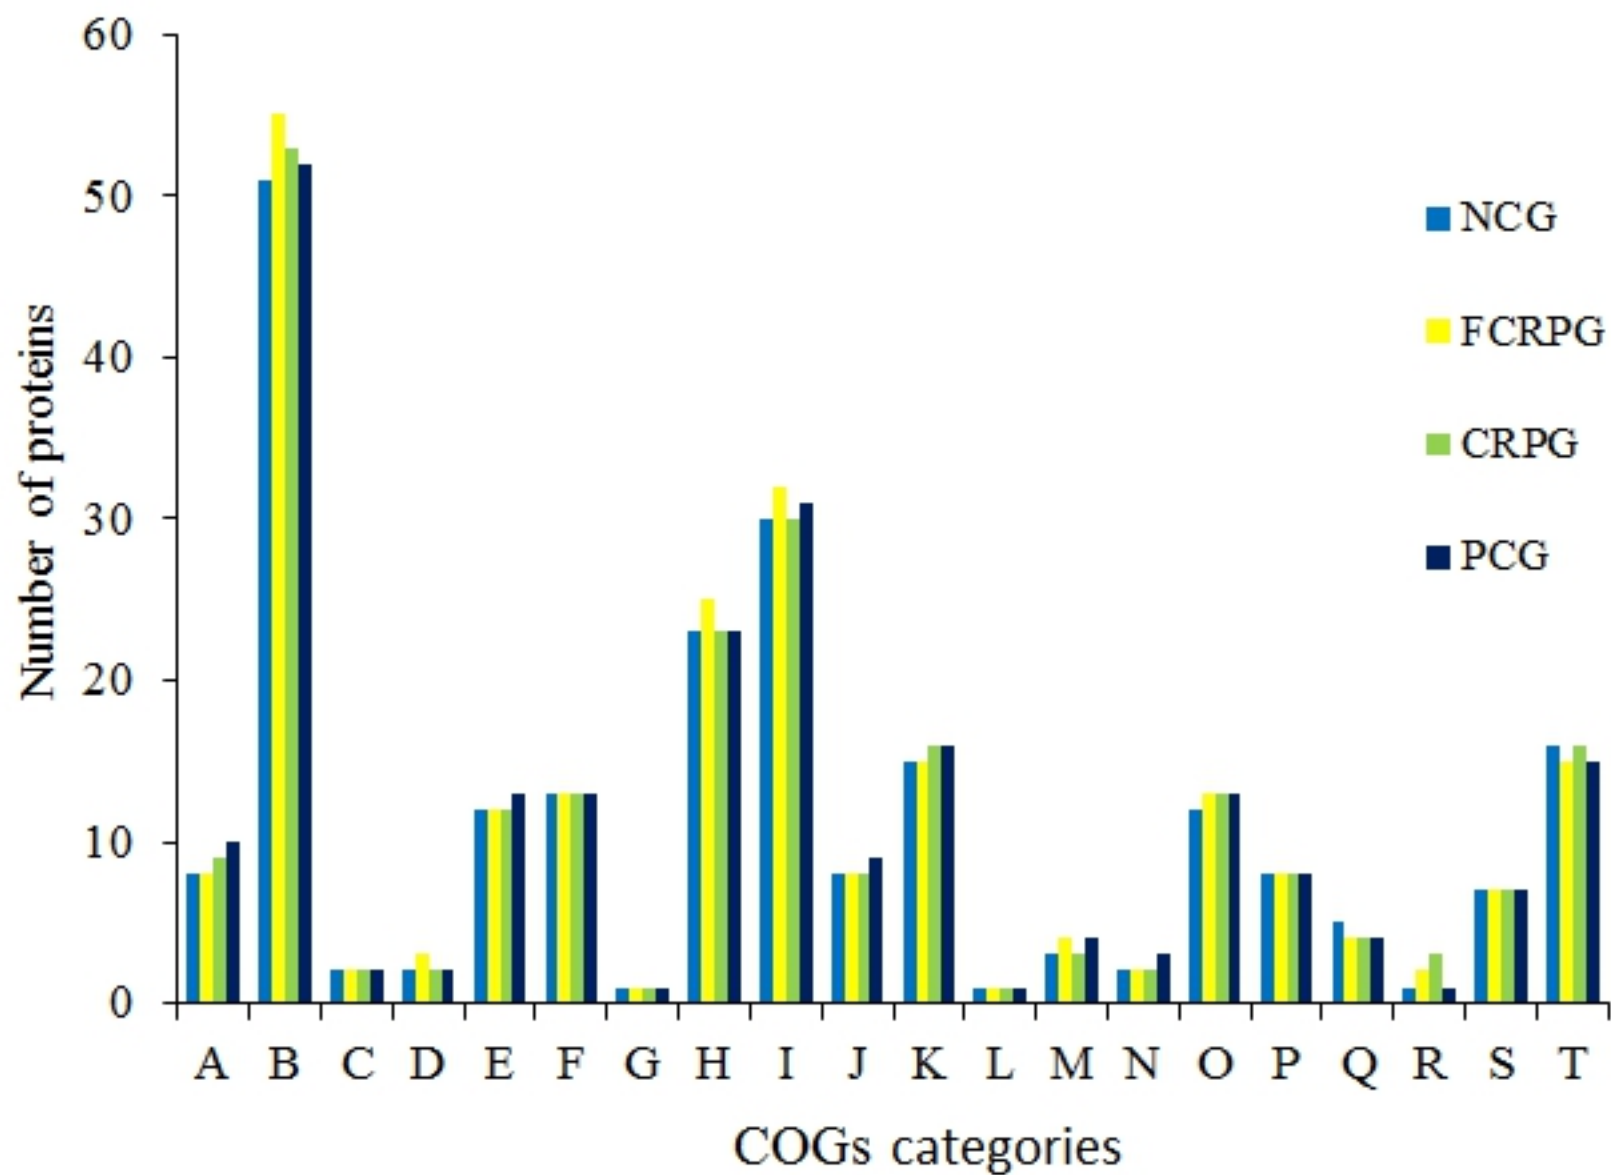

Figure 6

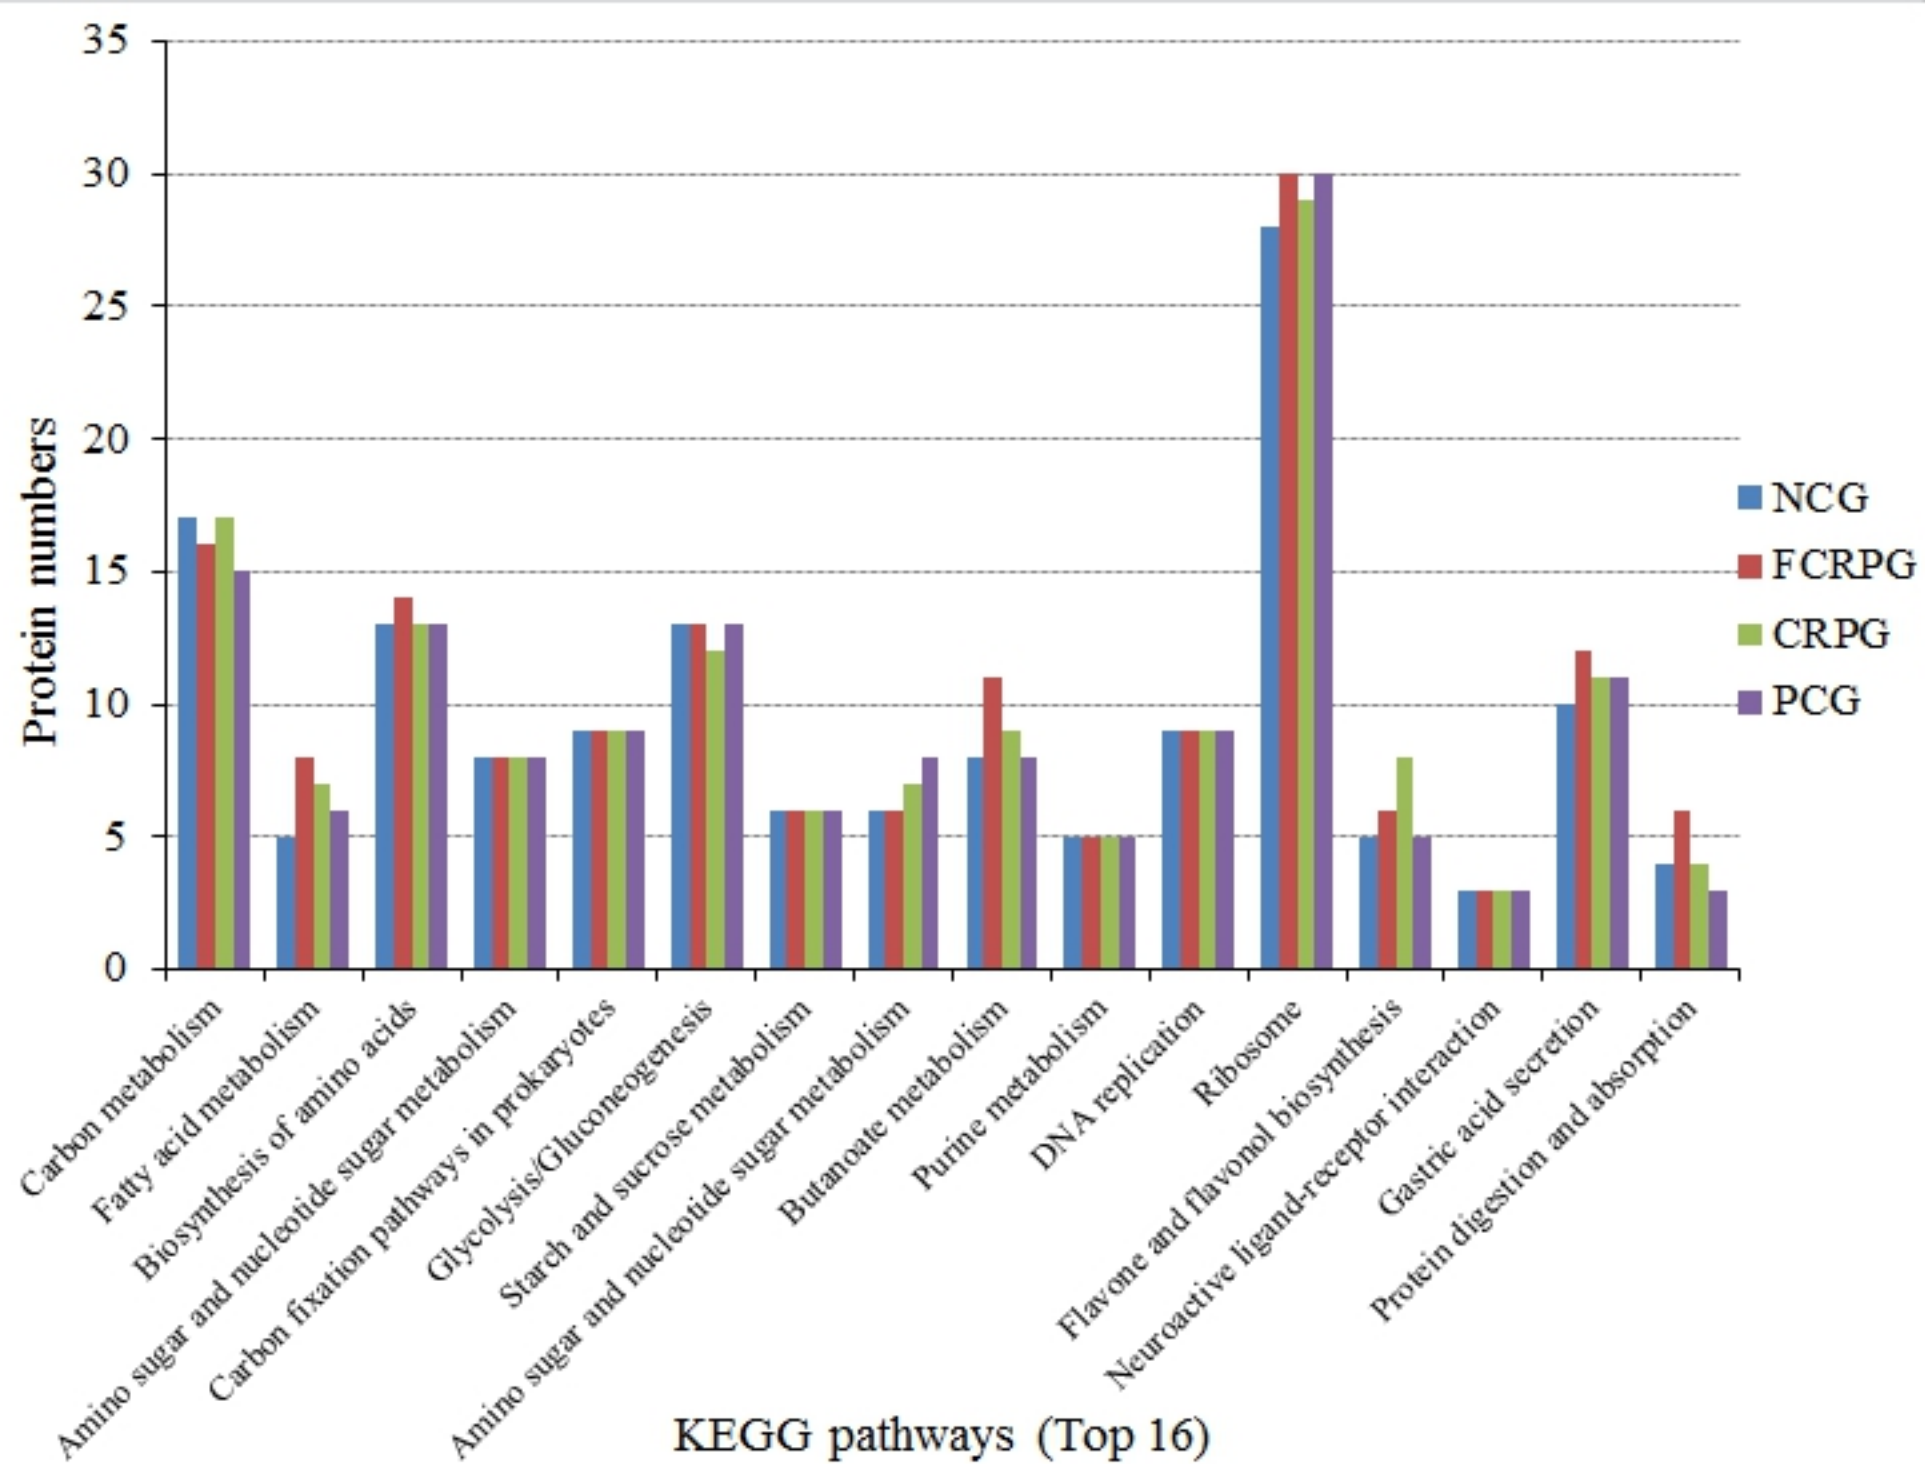

Figure 7

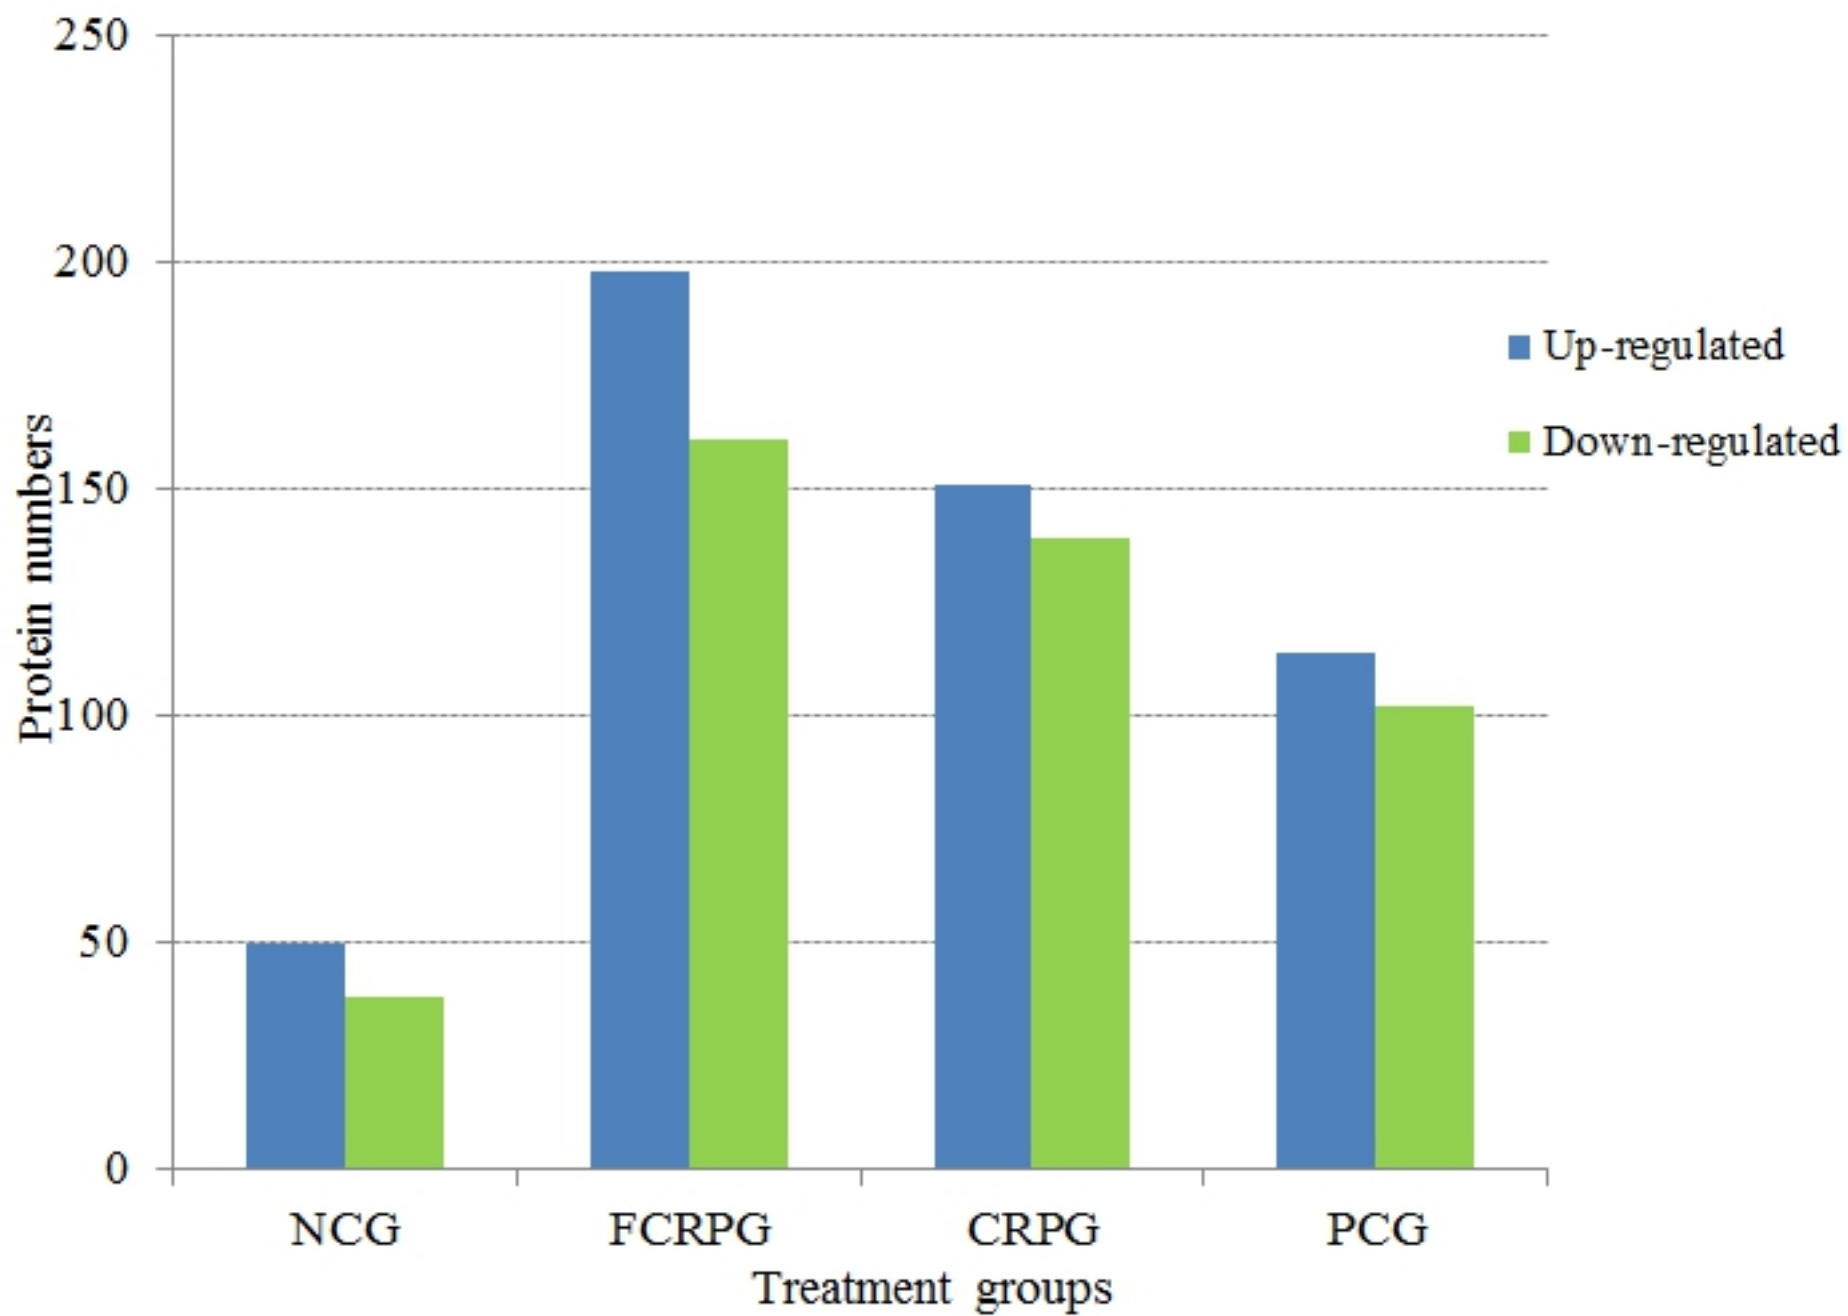

Figure 5



Table 1. Composition and nutrient levels of experiment diet (air-dry basis).

| Ingredients                      | Diets |       |       |                  |
|----------------------------------|-------|-------|-------|------------------|
|                                  | NCG   | FCRPG | CRPG  | <sup>4</sup> PCG |
| Corn                             | 56.0  | 51.5  | 51.0  | 56.0             |
| SM(45% CP)                       | 26.0  | 26.0  | 26.0  | 26.0             |
| Wheat bran                       | 8.0   | 8.0   | 8.0   | 8.0              |
| Rice bran                        | 6.0   | 6.0   | 6.0   | 6.0              |
| FCRP                             | -     | 4.5   | -     | -                |
| CRP                              | -     | -     | 5     | -                |
| <sup>1</sup> Vitamin premix      | 0.5   | 0.5   | 0.5   | 0.5              |
| <sup>2</sup> Mineral premix      | 0.5   | 0.5   | 0.5   | 0.5              |
| Antibiotics                      | -     | -     | -     | +                |
| <sup>3</sup> Others              | 3.0   | 3.0   | 3.0   | 3.0              |
| Total                            | 100   | 100   | 100   | 100              |
| Nutritional composition (NC)     |       |       |       |                  |
| Digestible energy<br>(DE, KJ/kg) | 14.98 | 14.65 | 14.93 | 14.96            |
| Crude protein (CP, %)            | 18.46 | 18.11 | 18.43 | 18.45            |
| Ether extract (EE, %)            | 4.25  | 4.02  | 4.11  | 4.23             |
| Ash (%)                          | 3.81  | 3.90  | 3.96  | 3.80             |

<sup>1</sup>Vitamin premix (mg/Kg diet): VA, 8000 IU; VD3, 1000 IU; VE, 60 IU; VK3, 0.7; VB1, 1.1; VB2, 2.3; VB6, 1.7; VB12, 0.02; VB5, 21; Niacin, 10;

<sup>2</sup>Mineral premix (mg/Kg diet): Mg, 160; Cu, 11; Co, 0.45; Zn, 100; Mn, 30; Fe, 145; Se, 0.1; I, 0.6.

<sup>3</sup>Others (mg/Kg diet): lysine: 1.3; methionine: 0.08; threonine: 0.08; Ca(H<sub>2</sub>PO<sub>4</sub>)<sub>2</sub>: 20.3; CaCO<sub>3</sub>: 3; NaCl: 3; FeSO<sub>4</sub> • 4H<sub>2</sub>O: 0.24; TiO<sub>2</sub> (IV): 2.0.

<sup>4</sup>PCG: refers to adding 0.11% compound antibiotics on the basis of NCG diet, and the components of this antibiotics are: bacitracin zinc / polymyxin sulfate =5/1.



Table 2. Diversity indexes of fecal microbiota for weaned piglets.

| Items | Simpson | Shannon-Weiner |          | Evenness index |
|-------|---------|----------------|----------|----------------|
|       |         | index          | Coverage |                |
| NCG   | 0.58    | 2.13           | 0.999553 | 0.78           |
| FCRPG | 0.62    | 2.29           | 0.999757 | 0.80           |
| CRPG  | 0.63    | 2.31           | 0.999621 | 0.81           |
| PCG   | 0.66    | 2.39           | 0.999489 | 0.83           |

bioRxiv preprint doi: <https://doi.org/10.1101/2020.04.14.040881>; this version posted April 14, 2020. The copyright holder for this preprint (which was not certified by peer review) is the author/funder, who has granted bioRxiv a license to display the preprint in perpetuity. It is made available under aCC-BY 4.0 International license.

Table 3. The SCFAs concentration in piglets' feces among dietary treatment groups.

| Categories     | NCG                      | FCRPG                    | CRPG                     | PCG                      | <i>P</i> -Values |
|----------------|--------------------------|--------------------------|--------------------------|--------------------------|------------------|
| Acetic acid    | 249.76±2.55 <sup>a</sup> | 281.70±2.50 <sup>c</sup> | 266.80±2.76 <sup>b</sup> | 247.97±2.70 <sup>a</sup> | 0.000            |
| Propionic acid | 94.97±3.91 <sup>a</sup>  | 107.93±5.68 <sup>b</sup> | 98.80±2.19 <sup>a</sup>  | 98.40±0.75 <sup>a</sup>  | 0.013            |
| Butyric acid   | 55.8±1.3 <sup>a</sup>    | 61.9±1.10 <sup>b</sup>   | 57.63±1.15 <sup>a</sup>  | 56.30±0.98 <sup>a</sup>  | 0.001            |
| Total SCFAs    | 400.53±4.58 <sup>a</sup> | 451.53±7.60 <sup>b</sup> | 423.23±6.05 <sup>c</sup> | 402.67±1.32 <sup>a</sup> | 0.000            |

Note: Three duplicates for each treatment group.

bioRxiv preprint doi: <https://doi.org/10.1101/2020.04.14.040881>; this version posted April 14, 2020. The copyright holder for this preprint (which was not certified by peer review) is the author/funder, who has granted bioRxiv a license to display the preprint in perpetuity. It is made available under aCC-BY 4.0 International license.
